# Supplementary material for: Copper-catalysed electrophilic carboamination of terminal alkynes with benzyne looked at through the computational lens
Source: Royal Society of Chemistry journal article supplement (doi:10.1039/d3dt04301k), 2024-01-01
Supplement: d3dt04301k1.pdf [file d3dt04301k1.pdf]

# Electronic Supplementary Material (ESI) for Dalton Transaction

# This journal is © The Royal Society of Chemistry 2024

## SUPPLEMENTARY INFORMATION

### Copper-Catalysed Electrophilic Carboamination of Terminal Alkynes with Benzynes Looked at through the Computational Lens

Sven Tobisch<sup>a</sup>

<sup>a</sup> School of Chemistry, University of St Andrews, Purdie Building, North Haugh, St Andrews, KY16 9ST, United Kingdom. E-mail: st40@st-andrews.ac.uk

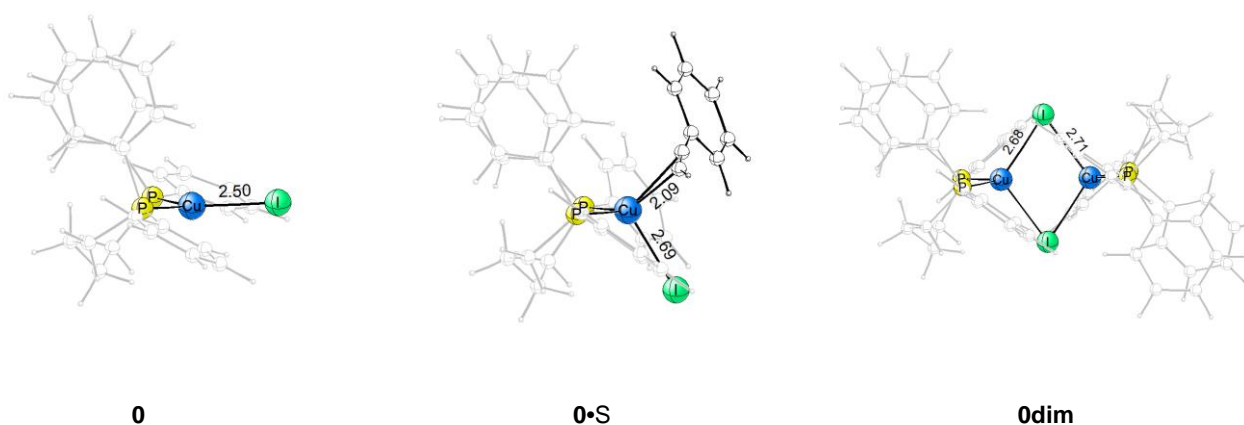

**Fig. S1** Selected structural parameter (angstrom) of the optimised structures of various forms of  $\{P^A P\}Cu^I$  iodide **0**.

The backbone of the  $\{P^A P\}$  ligand is greyed out to enhance the visualisation of crucial structural aspects.

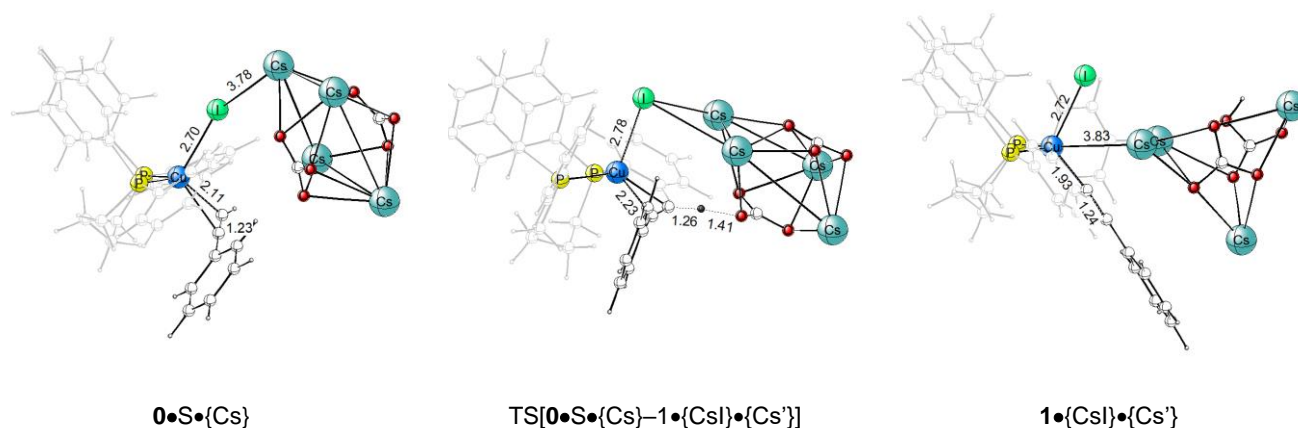

**Fig. S2** Selected structural parameter (angstrom) of the optimised structures of key stationary points for  $[Cs_2CO_3]_2$ -triggered transmetalation of  $\{PP\}Cu^I$  iodide **0** by alkyne **S**.

The backbone of the  $\{P^A P\}$  ligand is greyed out to enhance the visualisation of crucial structural aspects.

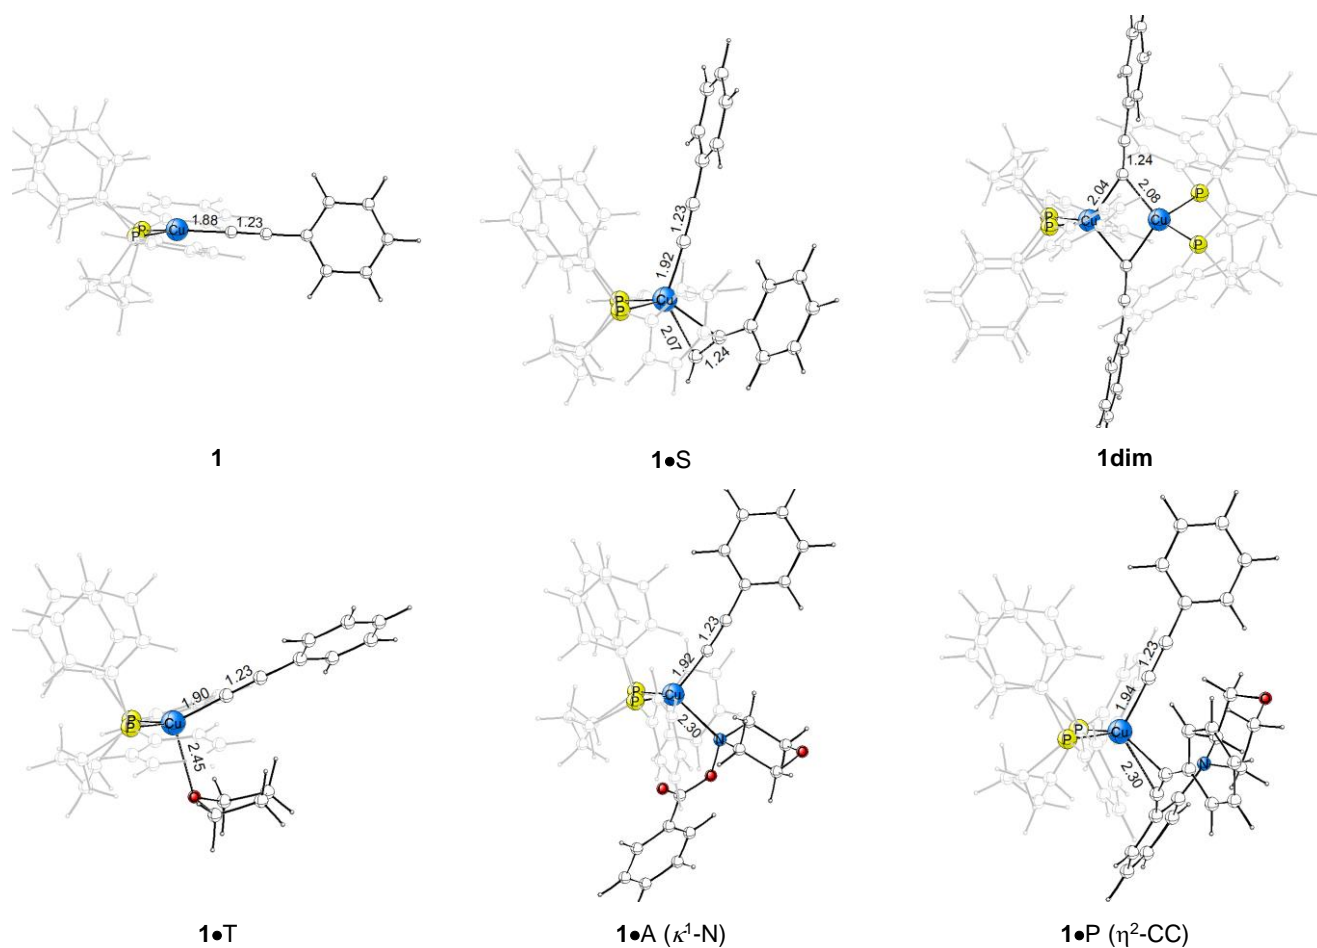

**Fig. S3** Selected structural parameter (angstrom) of the optimised structures of various forms of the catalytically competent  $\{\text{P}^{\text{A}}\text{P}\}\text{Cu}^{\text{I}}$  alkynyl **1**.

The backbone of the  $\{\text{P}^{\text{A}}\text{P}\}$  ligand is greyed out to enhance the visualisation of crucial structural aspects.

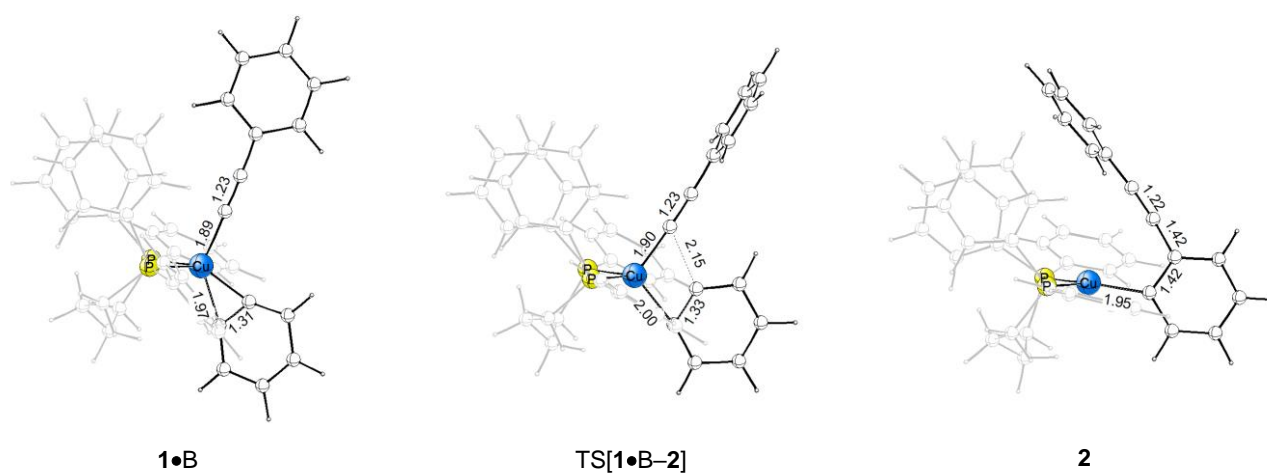

**Fig. S4** Selected structural parameter (angstrom) of the optimised structures of key stationary points for benzyne  $\text{C}\equiv\text{C}$  bond insertion into the  $\text{Cu}-\text{C}_{\text{alkynyl}}$  linkage at benzyne adduct **1•B** of the  $\{\text{P}^{\text{A}}\text{P}\}\text{Cu}^{\text{I}}$  alkynyl.

The backbone of the  $\{\text{P}^{\text{A}}\text{P}\}$  ligand is greyed out to enhance the visualisation of crucial structural aspects.

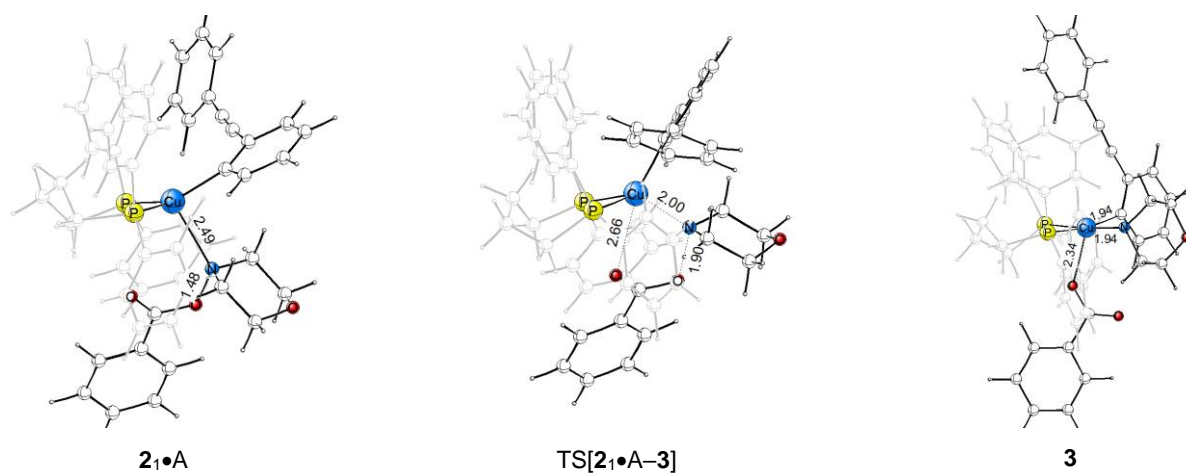

**Fig. S5** Selected structural parameter (angstrom) of the optimised structures of key stationary points for  $S_N2$ -type displacement of the *O*-benzoylhydroxylamine's benzoate leaving group evolving through a multicentre TS structure at amine adduct **2•A** of the arylcopper.

The backbone of the {P<sup>^</sup>P} ligand is greyed out to enhance the visualisation of crucial structural aspects.

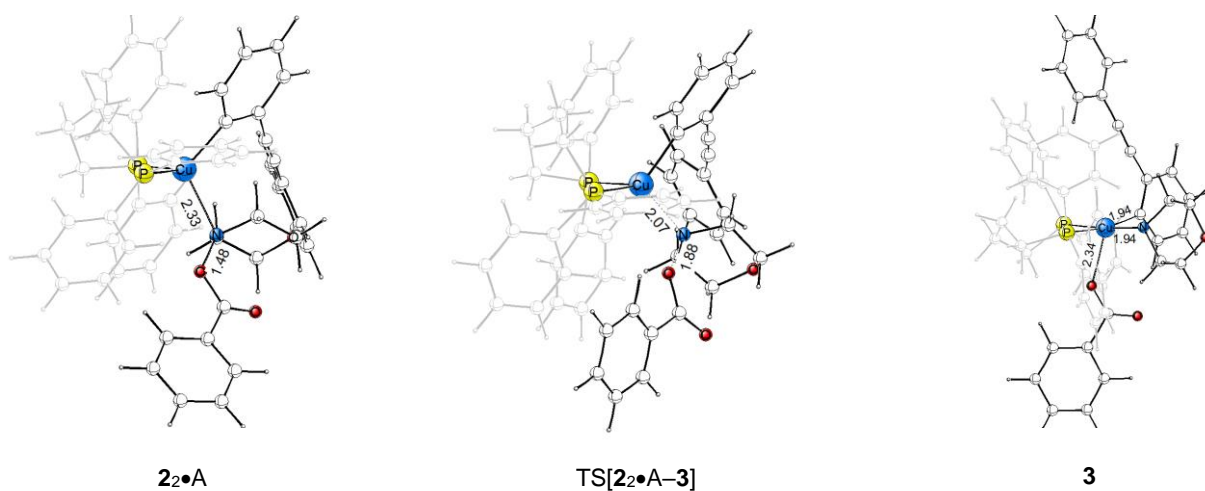

**Fig. S6** Selected structural parameter (angstrom) of the optimised structures of key stationary points for  $S_N2$ -type displacement of the *O*-benzoylhydroxylamine's benzoate leaving group evolving through a classic TS structure at amine adduct **2•A** of the arylcopper.

The backbone of the {P<sup>^</sup>P} ligand is greyed out to enhance the visualisation of crucial structural aspects.

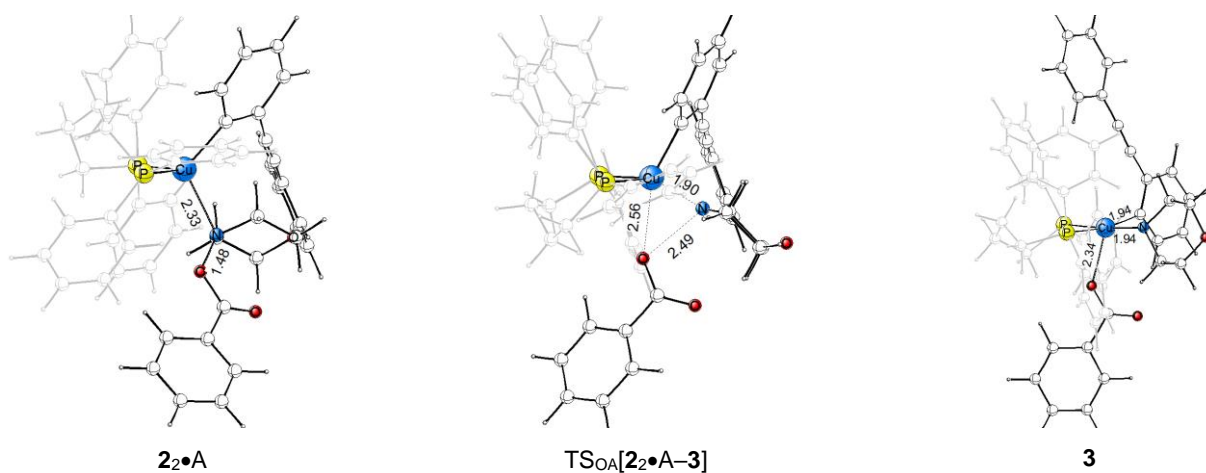

**Fig. S7** Selected structural parameter (angstrom) of the optimised structures of key stationary points for oxidative addition of O-benzoylhydroxylamine at amine adduct **2•A** of the arylcopper.

The backbone of the {P<sup>^</sup>P} ligand is greyed out to enhance the visualisation of crucial structural aspects.

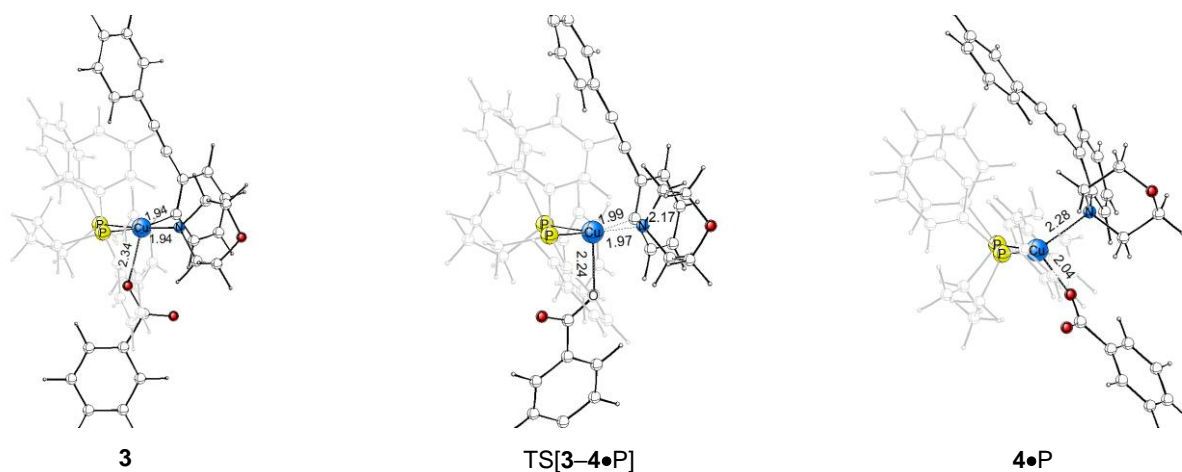

**Fig. S8** Selected structural parameter (angstrom) of the optimised structures of key stationary points for N–C bond forming reductive elimination at formal {P<sup>^</sup>P}Cu<sup>III</sup> intermediate **3**.

The backbone of the {P<sup>^</sup>P} ligand is greyed out to enhance the visualisation of crucial structural aspects.

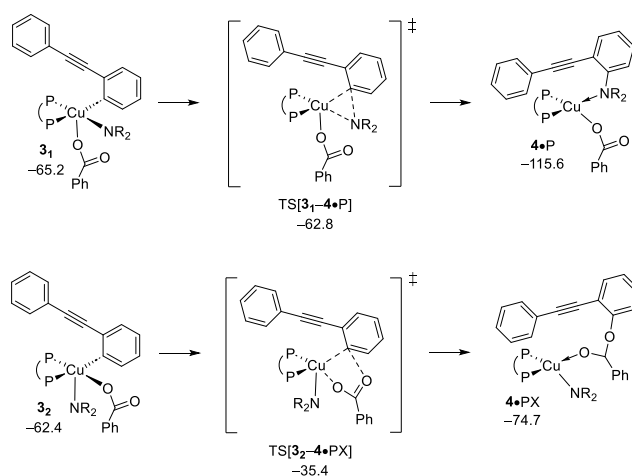

**Fig. S9** Alternative pathways for regioisomeric N–C or O–C bond forming reductive elimination commencing at formal {P<sup>^</sup>P}Cu<sup>III</sup> intermediate **3**. Free energies are given in kcal mol<sup>-1</sup> relative to  $\{\frac{1}{2}\times 1\text{dim} + B + A\}$ .

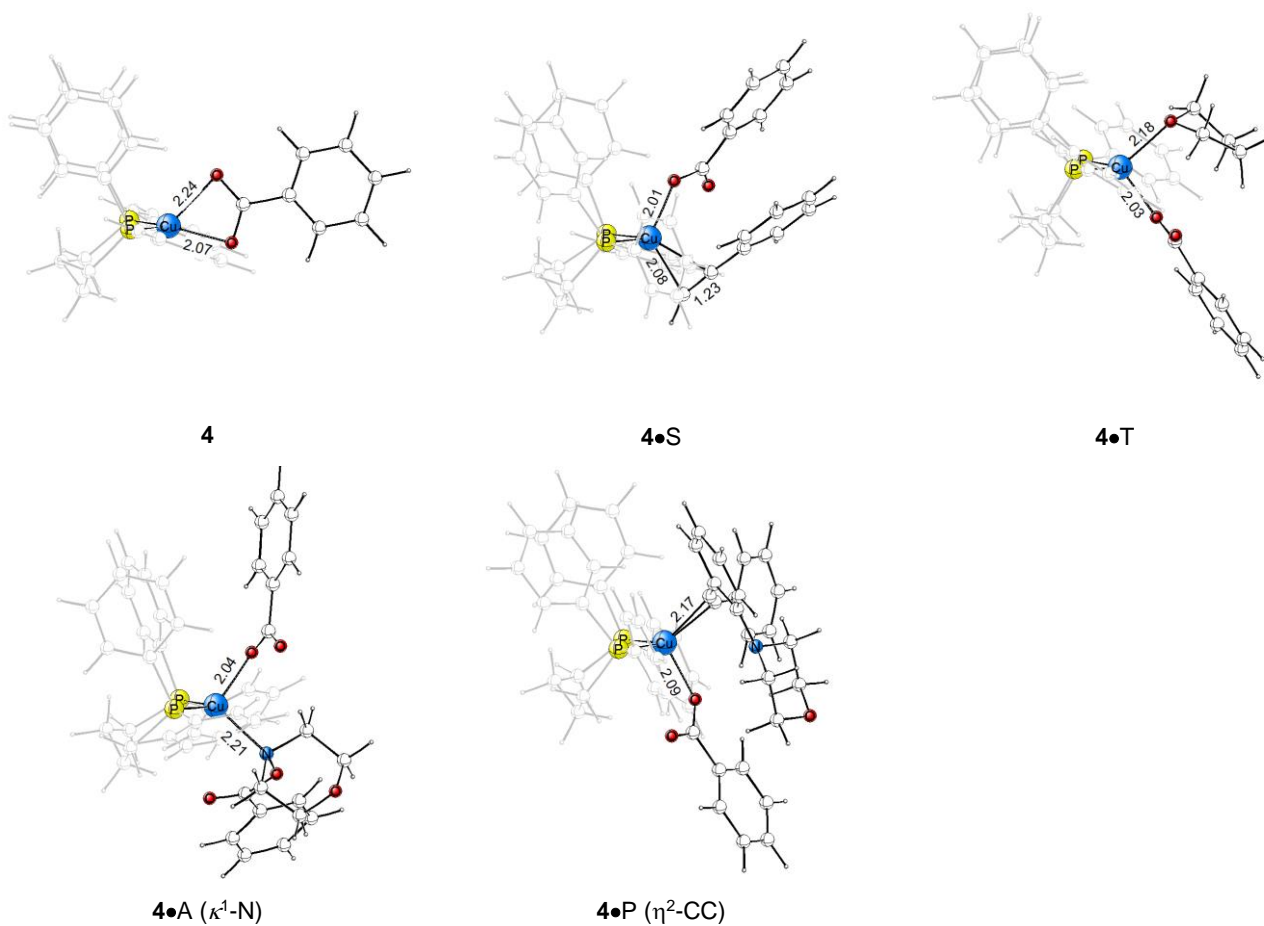

**Fig. S10** Selected structural parameter (angstrom) of the optimised structures of various forms of  $\{\text{P}^{\wedge}\text{P}\}\text{Cu}^{\text{I}}$  benzoate **4**.

The backbone of the  $\{\text{P}^{\wedge}\text{P}\}$  ligand is greyed out to enhance the visualisation of crucial structural aspects.

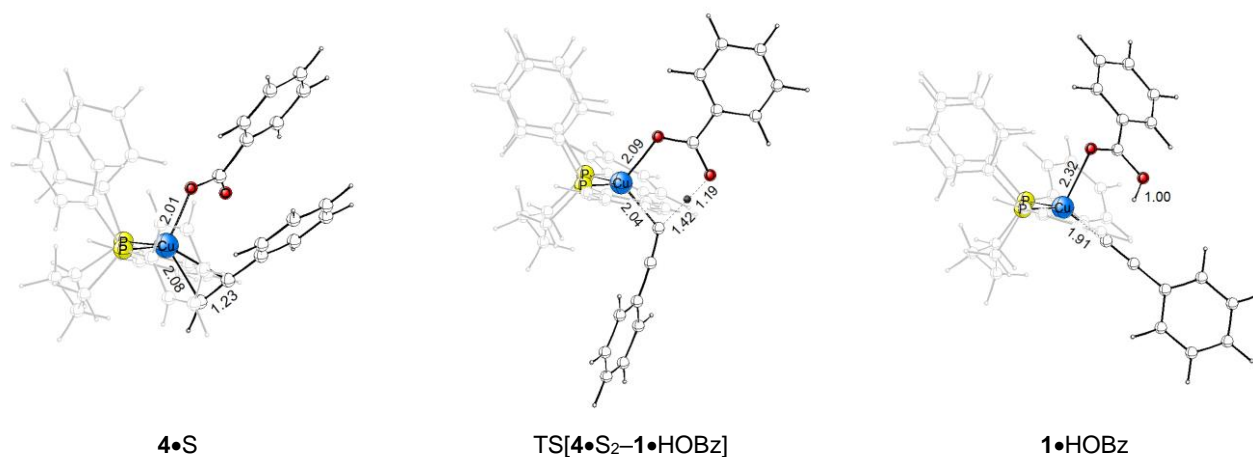

**Fig. S11** Selected structural parameter (angstrom) of the optimised structures of key stationary points for alkyne insertion of  $\{\text{P}^{\wedge}\text{P}\}\text{Cu}^{\text{I}}$  benzoate **4** by acetylene **S**.

The backbone of the  $\{\text{P}^{\wedge}\text{P}\}$  ligand is greyed out to enhance the visualisation of crucial structural aspects.

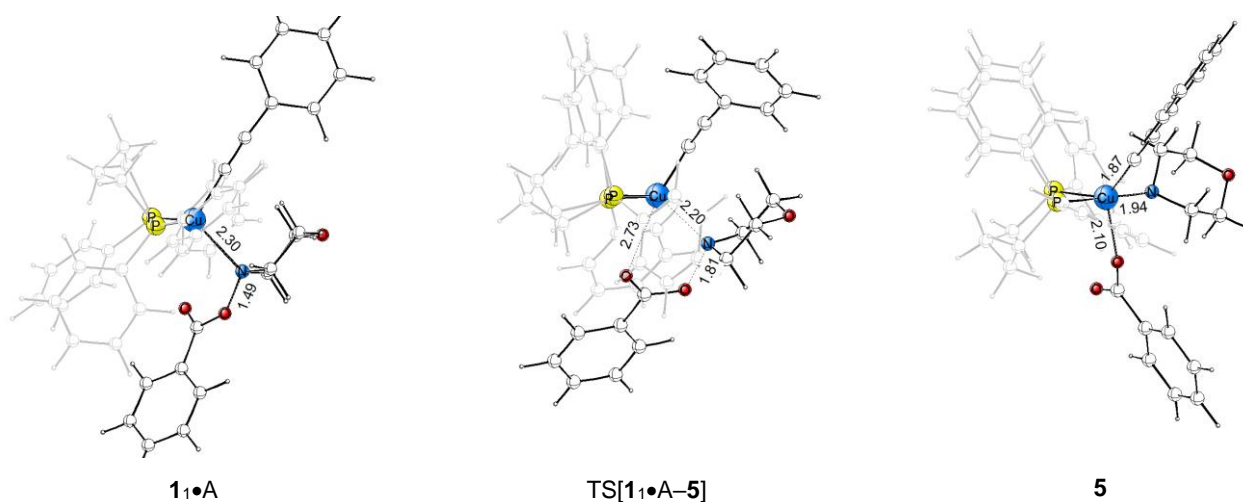

**Fig. S12** Selected structural parameter (angstrom) of the optimised structures of key stationary points for  $S_N2$ -type displacement of the *O*-benzoylhydroxylamine's benzoate leaving group evolving through a multicentre TS structure at amine adduct  $1\bullet A$  of the alkynylcopper.

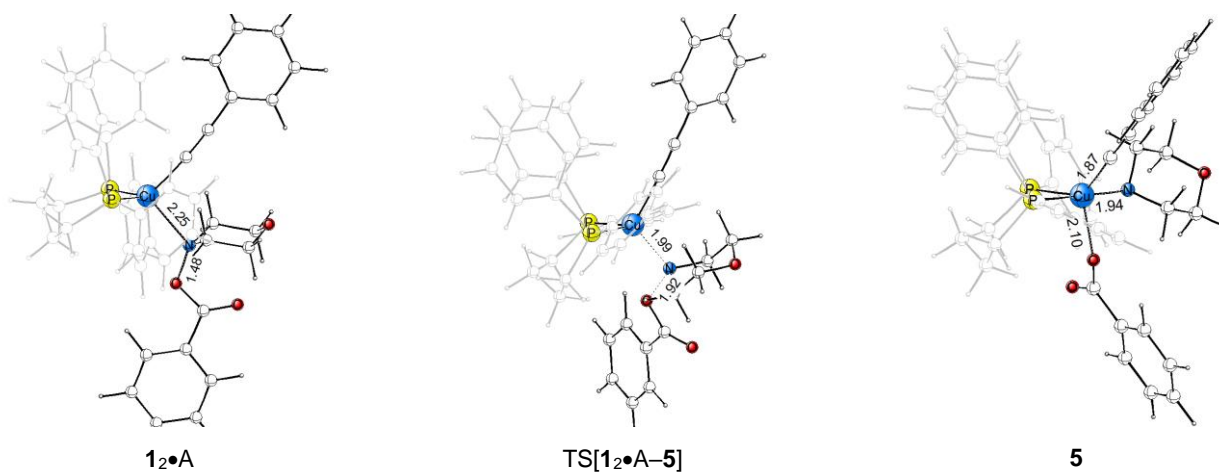

**Fig. S13** Selected structural parameter (angstrom) of the optimised structures of key stationary points for  $S_N2$ -type displacement of the *O*-benzoylhydroxylamine's benzoate leaving group evolving through a classic TS structure at amine adduct  $1\bullet A$  of the alkynylcopper.

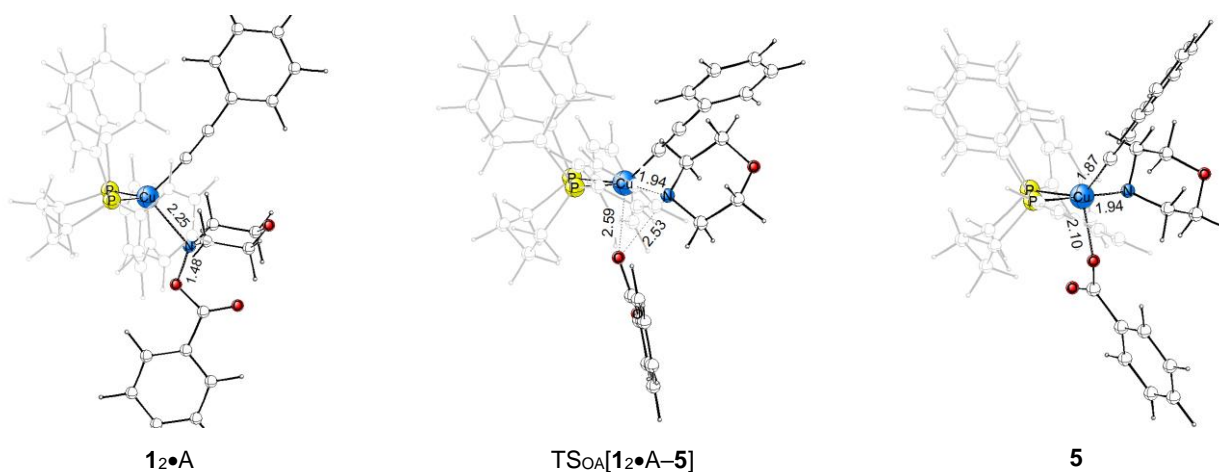

**Fig. S14** Selected structural parameter (angstrom) of the optimised structures of key stationary points for oxidative addition of *O*-benzoylhydroxylamine at amine adduct  $1\bullet A$  of the alkynylcopper.

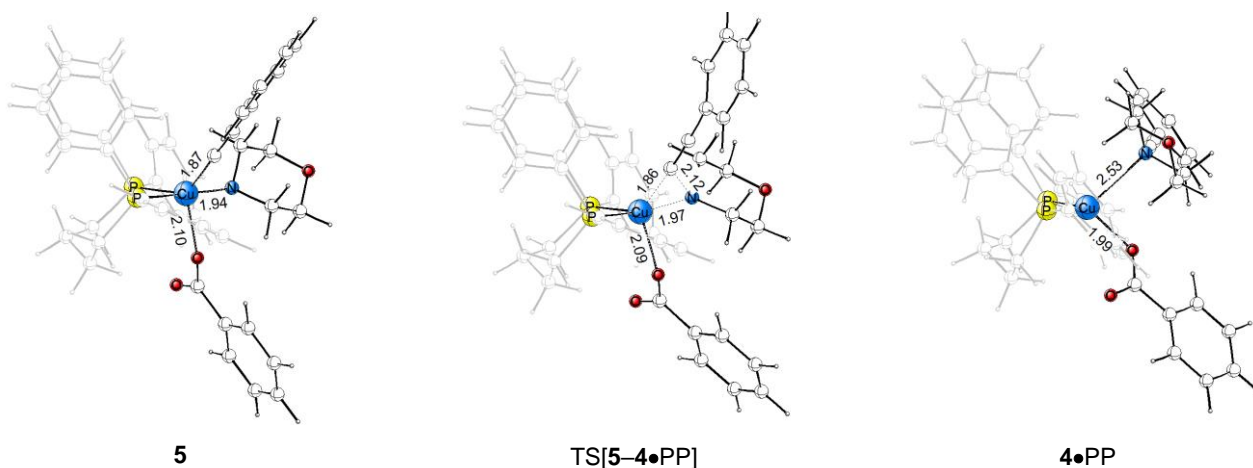

**Fig. S15** Selected structural parameter (angstrom) of the optimised structures of key stationary points for N–C bond forming reductive elimination at formal  $\{P^A P\}Cu^{III}$  intermediate **5**.

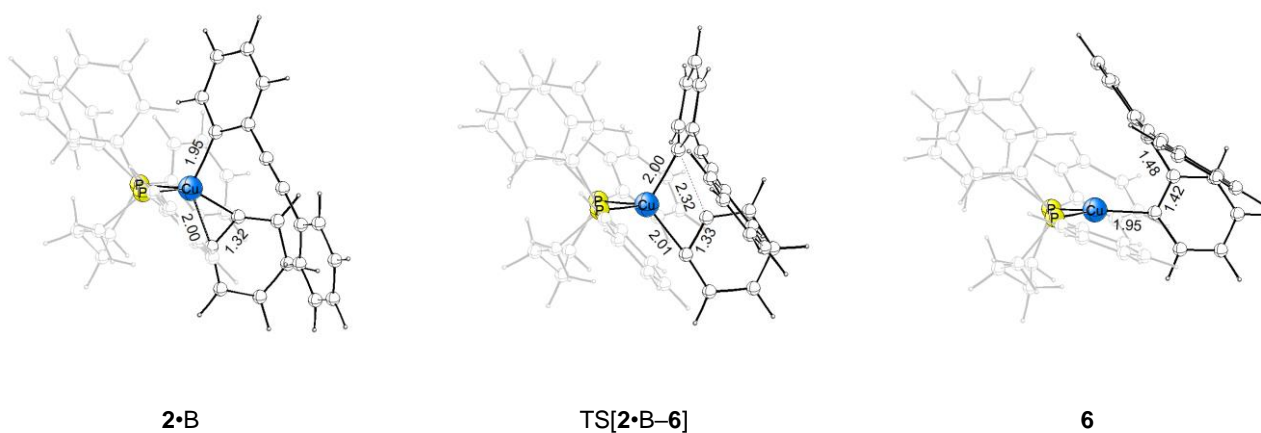

**Fig. S16** Selected structural parameter (angstrom) of the optimised structures of key stationary points for benzyne insertion into the Cu–C<sub>aryl</sub> linkage at benzyne adduct **2•B** of the  $\{P^A P\}Cu^I$  aryl.

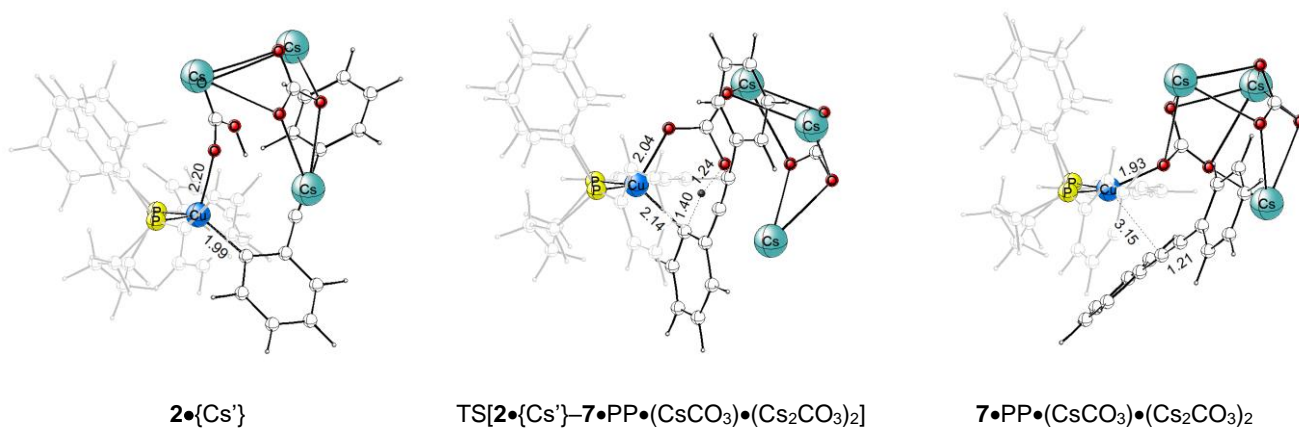

**Fig. S17** Selected structural parameter (angstrom) of the optimised structures of key stationary points for protonolytic release of diphenyl acetylene from  $\{P^A P\}Cu^I$  aryl **2** by caesium bicarbonate.

The backbone of the  $\{P^A P\}$  ligand is greyed out to enhance the visualisation of crucial structural aspects.

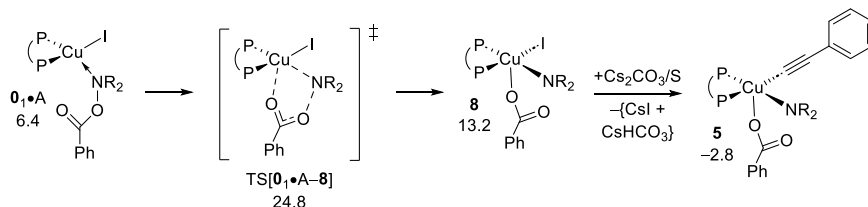

**Fig. S18** Alternative avenue for alkynylcupration to involve formal  $\{P^{\wedge}P\}Cu^{III}$  species – oxidative S<sub>N</sub>2-type oxidative addition of the hydroxylamine ester electrophile A, thus affording  $\{P^{\wedge}P\}Cu^{III}$  carboxylate amido iodide **8**, to be followed by facile transmetalation by alkyne S to deliver  $\{P^{\wedge}P\}Cu^{III}$  intermediate **5**. Free energies are given in kcal mol<sup>-1</sup> relative to  $\{\frac{1}{2}x0dim + A + S\}$ .

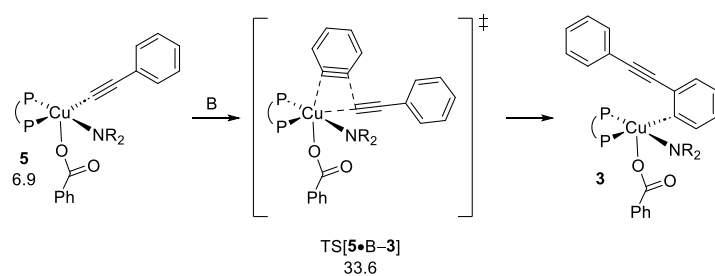

**Fig. S19** Alternative avenue for alkynylcupration to involve formal  $\{P^{\wedge}P\}Cu^{III}$  species – benzyne insertion into the Cu–C<sub>alkynyl</sub> linkage commencing at  $\{P^{\wedge}P\}Cu^{III}$  carboxylate amido alkynyl **5**. Free energies are given in kcal mol<sup>-1</sup> relative to  $\{\frac{1}{2}x1dim + A + B\}$ .



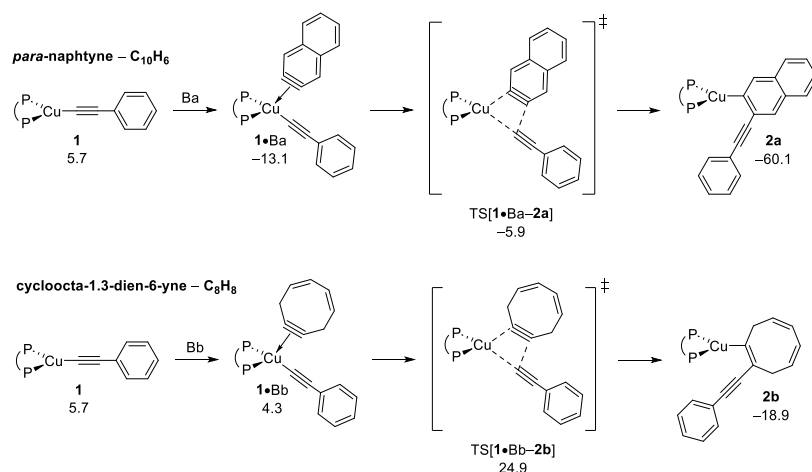

**Fig. S20** Insertion of various arynes into the Cu–C<sub>alkynyl</sub> linkage at substrate adduct 1•Bx of the {P<sup>Λ</sup>P}Cu<sup>I</sup> alkynyl.

Free energies are given in kcal mol<sup>-1</sup> relative to {½x1dim + Bx + A}.

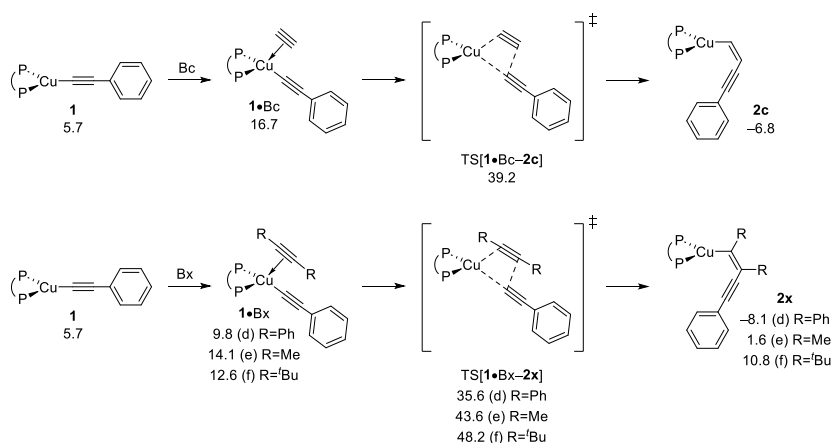

**Fig. S21** Insertion of various acetylenes into the Cu–C<sub>alkynyl</sub> linkage at substrate adduct 1•Bx of the {P<sup>Λ</sup>P}Cu<sup>I</sup> alkynyl.

Free energies are given in kcal mol<sup>-1</sup> relative to {½x1dim + Bx + A}.

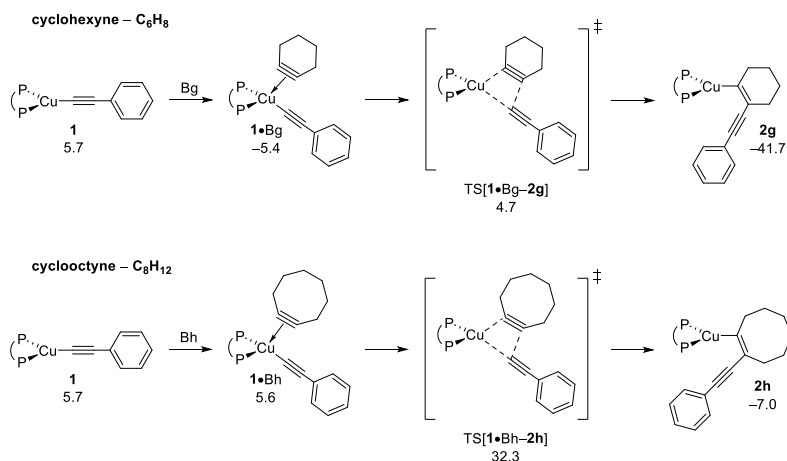

**Fig. S22** Insertion of various cycloalkynes into the Cu–C<sub>alkynyl</sub> linkage at substrate adduct 1•Bx of the {P<sup>Λ</sup>P}Cu<sup>I</sup> alkynyl.

Free energies are given in kcal mol<sup>-1</sup> relative to {½x1dim + Bx + A}.

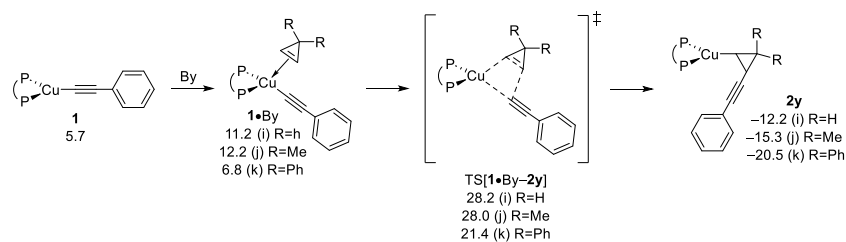

**Fig. S23** Insertion of various cyclopropenes into the Cu–C<sub>alkynyl</sub> linkage at substrate adduct **1•B<sub>x</sub>** of the {P<sup>o</sup>P}Cu<sup>I</sup> alkynyl.

Free energies are given in kcal mol<sup>-1</sup> relative to {½x**1dim** + B<sub>x</sub> + A}.

**Table S1** NBO analysis of aryne and acetylene bonding at {P<sup>o</sup>P}Cu<sup>I</sup> alkynyl complex **1** exemplified for adducts **1•B** and **1•B<sub>c</sub>**, respectively.

| species     | bond         | ON <sup>a</sup> | $\delta E^2$ [kcalmol <sup>-1</sup> ] <sup>a</sup> |                              | WBI <sup>a</sup> |
|-------------|--------------|-----------------|----------------------------------------------------|------------------------------|------------------|
| benzyne     | C–C $\sigma$ | 1.99            |                                                    |                              | 2.33             |
|             | C–C $\pi$    | 1.92            |                                                    |                              |                  |
|             | C–C $\pi$    | 1.67            |                                                    |                              |                  |
| <b>1•B</b>  | Cu–C         |                 | C–C $\pi \rightarrow$ Cu                           | Cu $\rightarrow$ C–C $\pi^*$ | 0.51             |
|             | Cu–C'        |                 | 181.7 kcal mol <sup>-1</sup>                       | 46.0 kcal mol <sup>-1</sup>  | 0.50             |
|             | C–C $\sigma$ | 1.95            |                                                    |                              | 1.72             |
|             | C–C $\sigma$ | 1.68            |                                                    |                              |                  |
|             | C–C $\pi$    | 1.64            |                                                    |                              |                  |
| acetylene   | C–C $\sigma$ | 2.00            |                                                    |                              | 2.99             |
|             | C–C $\pi$    | 2.00            |                                                    |                              |                  |
|             | C–C $\pi$    | 1.99            |                                                    |                              |                  |
| <b>1•Ac</b> | Cu–C         |                 | C–C $\pi \rightarrow$ Cu                           | Cu $\rightarrow$ C–C $\pi^*$ | 0.42             |
|             | Cu–C'        |                 | 131.5 kcal mol <sup>-1</sup>                       | 18.7 kcal mol <sup>-1</sup>  | 0.40             |
|             | C–C $\sigma$ | 1.99            |                                                    |                              | 2.51             |
|             | C–C $\sigma$ | 1.98            |                                                    |                              |                  |
|             | C–C $\pi$    | 1.75            |                                                    |                              |                  |

<sup>a</sup> ON and WBI represent occupation number and Wiberg bond index, respectively, whilst the second-order perturbation energy quantifies the electron transfer taking place due to substrate binding.



| 1dim (cont) |           |           | O•S•{Cs}                           |    |           | O•S•{Cs} (cont) |           |   |          |           |          |
|-------------|-----------|-----------|------------------------------------|----|-----------|-----------------|-----------|---|----------|-----------|----------|
|             |           |           | E <sub>t</sub> = -4620.852020 a.u. |    |           |                 |           |   |          |           |          |
| H           | -4.640119 | -1.605219 | -2.734603                          | Cu | 0.861326  | 0.050092        | 0.049792  | O | 8.331279 | 2.089639  | 4.549122 |
| H           | -4.881344 | -1.537666 | 2.360246                           | P  | -0.510972 | -0.156200       | 1.889023  | O | 8.107354 | 1.145426  | 2.527122 |
| H           | -3.608679 | -2.597311 | 1.783292                           | P  | -0.350353 | 0.106109        | -1.938815 | O | 6.929185 | 3.000684  | 3.035848 |
| H           | -5.047973 | -0.725614 | -0.165211                          | C  | -1.833266 | -1.455517       | 1.657112  | C | 7.811127 | 2.087804  | 3.360124 |
| H           | -5.725208 | -2.278290 | 0.249891                           | C  | -2.379218 | -1.406370       | 0.225816  | O | 5.422793 | 0.331596  | 5.785999 |
| H           | -4.236377 | -3.425738 | -1.079451                          | C  | -1.483927 | -2.171290       | -0.763365 | O | 4.366928 | 1.470017  | 4.154216 |
| C           | -3.165704 | 2.360307  | 2.422964                           | C  | -1.285310 | -1.500500       | -2.123646 | C | 4.984936 | 0.394558  | 4.571333 |
| C           | -5.238150 | 3.572470  | 2.640023                           | C  | -1.569446 | 1.326958        | 2.173036  | O | 5.191538 | -0.588829 | 3.752624 |
| C           | -5.259836 | 1.234170  | 2.045596                           | C  | 0.158643  | -0.497556       | 3.561040  | H | 2.264694 | 3.435098  | 2.531194 |
| C           | -5.939954 | 2.419310  | 2.311511                           | C  | 0.611677  | 0.212243        | -3.507955 | C | 3.249175 | -0.156937 | 3.523623 |
| H           | -7.025627 | 2.437123  | 2.258406                           | C  | -1.562485 | 1.466113        | -2.209333 | H | 3.280094 | -0.579032 | 1.426402 |
| H           | -5.833979 | 0.351340  | 1.781731                           | H  | -0.491510 | -2.302061       | -0.317532 | H | 3.125066 | 0.538041  | 5.549801 |
| C           | -3.846668 | 3.538499  | 2.696257                           | H  | -0.657987 | -2.141133       | -2.754471 | H | 3.497326 | -1.171982 | 3.800289 |
| H           | -2.078505 | 2.348893  | 2.446007                           | H  | -2.232921 | -1.363253       | -2.657412 |   |          |           |          |
| H           | -5.771583 | 4.498190  | 2.841955                           | H  | -2.630341 | -1.279032       | 2.387999  |   |          |           |          |
| H           | -2.078505 | 2.348893  | 2.446007                           | H  | -1.397681 | -2.440754       | 1.865017  |   |          |           |          |
| H           | -5.771583 | 4.498190  | 2.841955                           | H  | -2.487197 | -0.356079       | -0.073848 |   |          |           |          |
| H           | -3.286697 | 4.437156  | 2.942895                           | H  | -3.395388 | -1.819343       | 0.205702  |   |          |           |          |
| C           | -1.272678 | 1.376732  | -3.751540                          | H  | -1.883122 | -3.182912       | -0.915223 |   |          |           |          |
| C           | -1.443296 | 1.320350  | -6.154486                          | C  | -2.361300 | 1.438708        | 3.320839  |   |          |           |          |
| C           | -2.887017 | -0.066537 | -4.809809                          | C  | -3.273472 | 3.516002        | 2.503107  |   |          |           |          |
| C           | -2.453400 | 0.368447  | -6.057877                          | C  | -1.623633 | 2.330923        | 1.206930  |   |          |           |          |
| H           | -2.911363 | -0.035311 | -6.957900                          | C  | -2.478788 | 3.417633        | 1.367701  |   |          |           |          |
| H           | -3.697478 | -0.789136 | -4.754486                          | H  | -2.512649 | 4.186875        | 0.600934  |   |          |           |          |
| C           | -0.853881 | 1.821154  | -4.999571                          | H  | -0.980877 | 2.276062        | 0.335104  |   |          |           |          |
| H           | -0.802519 | 1.764731  | -2.851308                          | C  | -3.208113 | 2.527255        | 3.483360  |   |          |           |          |
| H           | -1.111476 | 1.665522  | -7.130762                          | H  | -2.301287 | 0.681198        | 4.099566  |   |          |           |          |
| H           | -0.042501 | 2.541078  | -5.068064                          | H  | -3.939121 | 4.366082        | 2.632254  |   |          |           |          |
| C           | -5.549940 | 1.021886  | -2.359808                          | H  | -3.815756 | 2.608653        | 4.381217  |   |          |           |          |
| C           | -6.261915 | 3.171055  | -1.527609                          | C  | 1.881971  | 0.792267        | -3.494490 |   |          |           |          |
| C           | -4.020639 | 2.392631  | -1.105066                          | C  | 2.077092  | 0.459420        | -5.875678 |   |          |           |          |
| C           | -4.999813 | 3.371270  | -0.980645                          | C  | 0.075958  | -0.230994       | -4.721782 |   |          |           |          |
| H           | -4.775269 | 4.285021  | -0.437355                          | C  | 0.807822  | -0.113318       | -5.896619 |   |          |           |          |
| H           | -3.044882 | 2.544666  | -0.650719                          | H  | 0.382405  | -0.461950       | -6.834229 |   |          |           |          |
| C           | -6.534686 | 1.993441  | -2.217359                          | H  | -0.923005 | -0.659420       | -4.757122 |   |          |           |          |
| H           | -5.781898 | 0.120742  | -2.921447                          | C  | 2.608281  | 0.917576        | -4.675854 |   |          |           |          |
| H           | -7.033594 | 3.929088  | -1.416719                          | H  | 2.292543  | 1.170022        | -2.560009 |   |          |           |          |
| H           | -7.517676 | 1.831057  | -2.653110                          | H  | 2.645844  | 0.555156        | -6.797031 |   |          |           |          |
| C           | -2.835935 | -0.381382 | 4.578498                           | H  | 3.592918  | 1.377223        | -4.653573 |   |          |           |          |
| C           | -1.214671 | -1.626598 | 5.858970                           | C  | -1.037629 | 2.756537        | -2.364244 |   |          |           |          |
| C           | -1.038397 | -1.534431 | 3.457865                           | C  | -3.265049 | 3.672570        | -2.495566 |   |          |           |          |
| C           | -0.561127 | -1.981065 | 4.684426                           | C  | -2.948720 | 1.299807        | -2.194521 |   |          |           |          |
| H           | 0.342041  | -2.584946 | 4.722329                           | C  | -3.793118 | 2.397679        | -2.336994 |   |          |           |          |
| H           | -0.514478 | -1.794807 | 2.541281                           | H  | -4.869880 | 2.249951        | -2.323253 |   |          |           |          |
| C           | -2.349355 | -0.822742 | 5.804207                           | H  | -3.391754 | 0.316376        | -2.070875 |   |          |           |          |
| H           | -3.718965 | 0.252378  | 4.544965                           | C  | -1.883262 | 3.847402        | -2.509060 |   |          |           |          |
| H           | -0.833749 | -1.967063 | 6.818849                           | H  | 0.039072  | 2.909422        | -2.355230 |   |          |           |          |
| H           | -2.861362 | -0.538039 | 6.720478                           | H  | -3.926482 | 4.528020        | -2.606119 |   |          |           |          |
|             |           |           |                                    | H  | -1.458604 | 4.840721        | -2.628885 |   |          |           |          |
|             |           |           |                                    | C  | -0.419926 | -1.425870       | 4.432469  |   |          |           |          |
|             |           |           |                                    | C  | 1.196114  | -0.859505       | 6.130004  |   |          |           |          |
|             |           |           |                                    | C  | 1.274145  | 0.233173        | 3.985132  |   |          |           |          |
|             |           |           |                                    | C  | 1.784438  | 0.058600        | 5.266319  |   |          |           |          |
|             |           |           |                                    | H  | 2.667055  | 0.619360        | 5.556959  |   |          |           |          |
|             |           |           |                                    | H  | 1.776302  | 0.923907        | 3.310544  |   |          |           |          |
|             |           |           |                                    | C  | 0.100581  | -1.605556       | 5.709972  |   |          |           |          |
|             |           |           |                                    | H  | -1.274020 | -2.022765       | 4.127172  |   |          |           |          |
|             |           |           |                                    | H  | 1.608476  | -1.005762       | 7.125342  |   |          |           |          |
|             |           |           |                                    | H  | -0.352336 | -2.338133       | 6.374225  |   |          |           |          |
|             |           |           |                                    | I  | 2.210370  | 2.391628        | 0.138070  |   |          |           |          |
|             |           |           |                                    | C  | 2.361870  | -1.258707       | -0.647487 |   |          |           |          |
|             |           |           |                                    | C  | 2.233136  | -1.898502       | 0.396833  |   |          |           |          |
|             |           |           |                                    | C  | 2.119950  | -2.674747       | 1.577483  |   |          |           |          |
|             |           |           |                                    | C  | 1.287709  | -3.809986       | 1.603487  |   |          |           |          |
|             |           |           |                                    | C  | 1.203231  | -4.578019       | 2.754338  |   |          |           |          |
|             |           |           |                                    | C  | 2.867546  | -2.335443       | 2.717290  |   |          |           |          |
|             |           |           |                                    | C  | 2.781567  | -3.121421       | 3.855950  |   |          |           |          |
|             |           |           |                                    | C  | 1.947623  | -4.234995       | 3.882492  |   |          |           |          |
|             |           |           |                                    | H  | 0.561258  | -5.455297       | 2.769297  |   |          |           |          |
|             |           |           |                                    | H  | 0.728783  | -4.085759       | 0.713515  |   |          |           |          |
|             |           |           |                                    | H  | 3.524440  | -1.468346       | 2.738914  |   |          |           |          |
|             |           |           |                                    | H  | 1.876413  | -4.841067       | 4.782268  |   |          |           |          |
|             |           |           |                                    | H  | 3.369989  | -2.834757       | 4.722648  |   |          |           |          |
|             |           |           |                                    | H  | 2.793181  | -1.044666       | -1.604853 |   |          |           |          |
|             |           |           |                                    | Cs | 5.654531  | 0.695678        | 1.253855  |   |          |           |          |
|             |           |           |                                    | Cs | 6.247919  | 2.999974        | 6.104034  |   |          |           |          |
|             |           |           |                                    | Cs | 4.331440  | 3.923608        | 2.868411  |   |          |           |          |
|             |           |           |                                    | Cs | 7.983120  | -0.801608       | 4.711700  |   |          |           |          |





## 1dim (cont)

|   |           |           |           |
|---|-----------|-----------|-----------|
| C | 3.721400  | -2.094571 | 0.777212  |
| C | 3.743424  | 2.276558  | -0.997467 |
| C | 1.936350  | 1.929148  | -3.107443 |
| C | 1.884950  | -1.741986 | 2.894159  |
| C | 3.710310  | 0.411145  | 2.262353  |
| H | 4.878046  | -0.566599 | -0.203051 |
| H | 4.369647  | -2.463561 | 1.581673  |
| H | 3.079582  | -2.935721 | 0.484217  |
| H | 3.262174  | -0.458893 | -3.508383 |
| H | 4.730868  | 0.101688  | -2.712769 |
| H | 2.725498  | -1.933544 | -1.577012 |
| H | 4.203597  | -2.378864 | -2.414878 |
| H | 5.445080  | -2.188393 | -0.509031 |
| C | 3.129573  | 3.478164  | -0.621318 |
| C | 5.229569  | 4.336605  | 0.188417  |
| C | 5.111852  | 2.122683  | -0.769965 |
| C | 5.848145  | 3.147738  | -0.179536 |
| H | 6.911632  | 3.009381  | -0.005825 |
| H | 5.624754  | 1.209096  | -1.053349 |
| C | 3.864443  | 4.498926  | -0.036126 |
| H | 2.064057  | 3.610725  | -0.779640 |
| H | 5.806967  | 5.131226  | 0.652575  |
| H | 3.360453  | 5.417333  | 0.254335  |
| C | 0.673534  | -2.414146 | 2.707050  |
| C | 0.780158  | -3.262840 | 4.961687  |
| C | 2.534361  | -1.831367 | 4.127838  |
| C | 1.982823  | -2.589849 | 5.155538  |
| H | 2.490871  | -2.646753 | 6.114430  |
| H | 3.464246  | -1.294624 | 4.295397  |
| C | 0.127565  | -3.173044 | 3.736155  |
| H | 0.155016  | -2.321364 | 1.755457  |
| H | 0.344224  | -3.843267 | 5.770113  |
| H | -0.826147 | -3.672443 | 3.586041  |
| C | 5.017404  | 0.131098  | 2.672877  |
| C | 5.272423  | 2.392780  | 3.474191  |
| C | 3.204704  | 1.702987  | 2.447171  |
| C | 3.976491  | 2.683716  | 3.058594  |
| H | 3.569708  | 3.683755  | 3.181118  |
| H | 2.209561  | 1.943794  | 2.077132  |
| C | 5.793613  | 1.118178  | 3.273301  |
| H | 5.441482  | -0.858432 | 2.526850  |
| H | 5.882372  | 3.162767  | 3.938547  |
| H | 6.809444  | 0.889633  | 3.584102  |
| C | 2.675962  | 2.166621  | -4.270075 |
| C | 0.834667  | 3.412325  | -5.204924 |
| C | 0.646950  | 2.452987  | -2.999682 |
| C | 0.103673  | 3.197595  | -4.042545 |
| H | -0.906152 | 3.589083  | -3.954620 |
| H | 0.069851  | 2.262624  | -2.097160 |
| C | 2.123660  | 2.895865  | -5.316801 |
| H | 3.691860  | 1.790513  | -4.360826 |
| H | 0.402371  | 3.978908  | -6.024924 |
| H | 2.703541  | 3.068252  | -6.219321 |
| C | -0.064728 | 1.634916  | 0.340139  |
| C | -0.005915 | 2.798818  | 0.758509  |
| C | 0.148933  | 4.120674  | 1.235303  |
| C | 0.437947  | 4.368970  | 2.592894  |
| C | 0.650881  | 5.662875  | 3.046029  |
| C | 0.064234  | 5.222999  | 0.360035  |
| C | 0.275734  | 6.513389  | 0.823794  |
| C | 0.574798  | 6.741691  | 2.166228  |
| H | 0.741624  | 7.752978  | 2.524962  |
| H | 0.490837  | 3.528227  | 3.279111  |
| H | 0.874411  | 5.833345  | 4.095785  |
| H | -0.160878 | 5.042623  | -0.687670 |
| H | 0.209665  | 7.349303  | 0.132607  |

## 1•T

E<sub>i</sub> = -3946.753344 a.u.

|    |           |           |           |
|----|-----------|-----------|-----------|
| Cu | 0.050814  | -0.502143 | -0.167186 |
| P  | -1.304493 | -0.639965 | 1.639094  |
| P  | -1.278832 | -0.419052 | -1.982063 |
| C  | -2.857869 | -1.661132 | 1.595319  |
| C  | -3.484677 | -1.631138 | 0.189914  |
| C  | -2.729727 | -2.524057 | -0.819104 |
| C  | -2.443512 | -1.864807 | -2.174874 |
| C  | -1.905546 | 1.074818  | 1.938936  |
| C  | -0.525387 | -1.061594 | 3.252073  |
| C  | -0.496705 | -0.266874 | -3.641720 |
| C  | -2.316330 | 1.103575  | -1.925608 |
| H  | -1.767362 | -2.829247 | -0.393291 |
| H  | -1.924441 | -2.579209 | -2.826303 |
| H  | -3.372412 | -1.585737 | -2.686894 |
| H  | -3.568462 | -1.320433 | 2.358216  |
| H  | -2.575685 | -2.688598 | 1.859831  |
| H  | -3.517158 | -0.595408 | -0.171217 |
| H  | -4.532091 | -1.950535 | 0.261065  |
| H  | -3.299220 | -3.446576 | -0.990982 |
| C  | -3.252007 | 1.443593  | 1.949369  |
| C  | -2.640465 | 3.747243  | 2.327535  |
| C  | -0.927221 | 2.063895  | 2.106656  |
| C  | -1.294693 | 3.386763  | 2.311386  |
| H  | -0.524831 | 4.141364  | 2.446471  |
| H  | 0.125681  | 1.794462  | 2.053082  |
| C  | -3.614851 | 2.774815  | 2.138386  |
| H  | -4.033392 | 0.704856  | 1.801758  |
| H  | -2.926892 | 4.784325  | 2.478675  |
| H  | -4.666065 | 3.048866  | 2.134986  |
| C  | -1.174443 | -0.543771 | -4.832421 |
| C  | 0.791016  | 0.046023  | -0.099259 |
| C  | 0.829151  | 0.172641  | -3.690388 |
| C  | 1.466758  | 0.332287  | -4.917404 |
| H  | 2.496457  | 0.677056  | -4.947181 |
| H  | 1.354320  | 0.384612  | -2.759107 |
| C  | -0.530341 | -0.392885 | -6.055277 |
| H  | -2.210062 | -0.874013 | -4.810563 |
| H  | 1.291405  | 0.165488  | -7.056102 |
| H  | -1.061684 | -0.613385 | -6.976948 |
| C  | -1.729683 | 2.232161  | -1.342286 |
| C  | -3.725605 | 3.514576  | -1.768113 |
| C  | -3.613694 | 1.198307  | -2.433890 |
| C  | -4.316185 | 2.396658  | -2.349039 |
| H  | -5.327365 | 2.456256  | -2.742021 |
| H  | -4.092069 | 0.341066  | -2.898555 |
| C  | -2.429071 | 3.430716  | -1.270620 |
| H  | -0.724408 | 2.161282  | -0.931326 |
| H  | -4.276788 | 4.448353  | -1.701043 |
| H  | -1.963776 | 4.294372  | -0.805438 |
| C  | -1.251587 | -1.515895 | 4.356920  |
| C  | 0.779496  | -1.649915 | 5.652443  |
| C  | 0.860103  | -0.901694 | 3.360663  |
| C  | 1.506116  | -1.188484 | 4.559173  |
| H  | 2.582173  | -1.057898 | 4.632841  |
| H  | 1.425178  | -0.549860 | 2.497580  |
| C  | -0.599391 | -1.814125 | 5.548596  |
| H  | -2.329829 | -1.633736 | 4.296950  |
| H  | 1.285187  | -1.881278 | 6.585699  |
| H  | -1.170858 | -2.170191 | 6.401268  |
| C  | 1.722149  | 0.365767  | 0.064573  |
| C  | 2.801873  | 0.918331  | 0.282949  |
| C  | 4.059063  | 1.517774  | 0.547426  |
| C  | 4.334677  | 2.097930  | 1.801109  |
| C  | 5.570194  | 2.672711  | 2.062307  |
| C  | 5.073571  | 1.540021  | -0.429096 |
| C  | 6.307517  | 2.114392  | -0.158923 |
| C  | 6.564524  | 2.684462  | 1.086109  |
| H  | 7.530860  | 3.134405  | 1.293691  |
| H  | 3.558988  | 2.087043  | 2.561457  |
| H  | 5.761050  | 3.115403  | 3.036361  |
| H  | 4.871014  | 1.097921  | -1.400049 |
| H  | 7.076504  | 2.119656  | -0.926884 |
| O  | 0.706875  | -2.843189 | -0.483303 |
| C  | 1.647022  | -2.980891 | -1.565755 |
| H  | 1.591624  | -4.010649 | -1.955494 |
| H  | 1.347721  | -2.281863 | -2.351993 |
| C  | 3.023765  | -2.684871 | -0.957523 |
| H  | 3.288374  | -1.635879 | -1.111947 |

## 1•T (cont)

|   |          |           |           |
|---|----------|-----------|-----------|
| H | 3.798288 | -3.317639 | -1.400770 |
| C | 2.827424 | -2.954276 | 0.555810  |
| H | 2.974756 | -2.026725 | 1.115149  |
| H | 3.514271 | -3.712069 | 0.943991  |
| C | 1.369604 | -3.414278 | 0.659551  |
| H | 0.852079 | -3.057513 | 1.554816  |
| H | 1.289522 | -4.512765 | 0.607771  |





## 1•P (cont)

C 2.807336 -0.369391 4.179027  
 C 3.517595 -1.461995 4.667839  
 H 4.068314 -1.382018 5.600673  
 C 1.039612 -3.132975 -1.227200  
 C 1.754876 -2.595721 -2.341445  
 C 0.275556 -4.298245 -1.393741  
 C 1.560868 -3.183990 -3.597185  
 C 0.129199 -4.884531 -2.642377  
 C 0.752027 -4.304940 -3.746525  
 N 2.571105 -1.488473 -2.141094  
 C 2.951118 -0.659283 -3.280857  
 C 3.710095 -1.632871 -1.217182  
 C 3.407613 0.694866 -2.748124  
 C 4.147779 -0.259968 -0.741851  
 O 4.514030 0.562786 -1.855458  
 H 2.798669 -3.701471 2.214589  
 H 1.543989 0.379321 2.589850  
 H -0.473755 -5.780019 -2.756458  
 H -0.232612 -4.712932 -0.528460  
 H 0.634630 -4.748240 -4.731526  
 H 2.068822 -2.772635 -4.463101  
 H 2.805760 0.567517 4.728402  
 H 3.744384 1.333230 -3.571914  
 H 4.080924 -3.514049 4.327972  
 H 3.432045 -2.250201 -0.361539  
 H 4.548193 -2.126465 -1.744778  
 H 2.084383 -0.513917 -3.933246  
 H 3.769327 -1.117634 -3.869801  
 H 3.329838 0.211624 -0.173296  
 H 5.038097 -0.339998 -0.109495  
 H 2.565549 1.179893 -2.229833

## 1•B

E<sub>t</sub> = -3945.242077 a.u.

Cu 0.883249 -0.991022 -0.319863  
 P -0.760042 -1.025981 1.612167  
 P -0.702612 -0.785681 -1.966558  
 C -2.239154 -2.165192 1.556938  
 C -2.887342 -2.240029 0.166508  
 C -2.033453 -3.040445 -0.842200  
 C -1.720218 -2.333797 -2.164849  
 C -1.478671 0.623706 1.949428  
 C -0.019378 -1.520701 3.219289  
 C 0.020012 -0.581991 -3.640469  
 C -1.869917 0.623983 -1.827295  
 H -1.076150 -3.297703 -0.375227  
 H -1.092977 -2.986550 -2.785271  
 H -2.625032 -2.129103 -2.750368  
 H -2.954928 -1.861151 2.331278  
 H -1.866363 -3.155252 1.848693  
 H -3.068916 -1.226998 -0.209188  
 H -3.878052 -2.700911 0.266360  
 H -2.528757 -3.991755 -1.073848  
 C -0.589389 1.664381 2.253021  
 C -2.424462 3.226607 2.371412  
 C -2.842856 0.909705 1.844748  
 C -3.310260 2.204557 2.050221  
 H -4.372779 2.411098 1.957455  
 H -3.556451 0.130068 1.597962  
 C -1.062927 2.951014 2.475814  
 H 0.477275 1.465418 2.303686  
 H -2.792111 4.235380 2.537995  
 H -0.360006 3.741812 2.722474  
 C 1.293375 -1.108288 -3.876102  
 C 1.168591 -0.395031 -6.175898  
 C -0.668463 0.051608 -4.677836  
 C -0.093664 0.142500 -5.941054  
 H -0.631631 0.640620 -6.742607  
 H -1.647541 0.486476 -4.495399  
 C 1.860829 -1.019064 -5.142317  
 H 1.842983 -1.575225 -3.061783  
 H 1.617269 -0.317526 -7.162170  
 H 2.852627 -1.425835 -5.316656  
 C -1.339018 1.840979 -1.383218  
 C -3.505764 2.880971 -1.598612  
 C -3.227411 0.550993 -2.154141  
 C -4.040873 1.674229 -2.036178  
 H -5.094649 1.603307 -2.290639  
 H -3.666834 -0.378532 -2.502945  
 C -2.154610 2.960519 -1.276281  
 H -0.289327 1.896800 -1.102797  
 H -4.142216 3.756414 -1.504280  
 H -1.733646 3.897015 -0.922478  
 C 0.864543 -2.606328 3.214124  
 C 1.122799 -2.427305 5.604973  
 C -0.322538 -0.892146 4.429995  
 C 0.249180 -1.343897 5.615066  
 H 0.008753 -0.846790 6.550698  
 H -1.002250 -0.044948 4.445527  
 C 1.426350 -3.058956 4.402557  
 H 1.124638 -3.092125 2.276906  
 H 1.569486 -2.775488 6.531993  
 H 2.113677 -3.899947 4.383860  
 C 1.639574 0.728225 -0.117349  
 C 2.122926 1.844773 0.029246  
 C 2.609852 3.164385 0.209638  
 C 1.716415 4.248940 0.299068  
 C 2.185456 5.542072 0.482252  
 C 3.988168 3.428046 0.309025  
 C 4.448843 4.724460 0.490675  
 C 3.553290 5.788115 0.579125  
 H 3.918610 6.800897 0.721146  
 H 0.650637 4.052452 0.226841  
 H 1.479485 6.365852 0.547807  
 H 4.683884 2.597765 0.239684  
 H 5.517309 4.908197 0.564299  
 C 1.460702 -2.871231 -0.456873  
 C 2.396731 -2.130536 0.080906  
 C 1.597149 -4.241815 -0.621997  
 C 3.620694 -2.554139 0.547445  
 C 2.821156 -4.759768 -0.162488  
 C 3.802818 -3.942236 0.405612

## 1•B (cont)

H 0.844202 -4.891844 -1.061959  
 H 4.376199 -1.913922 0.991203  
 H 3.011250 -5.826541 -0.253389  
 H 4.732649 -4.390615 0.747464



## 2 (cont)

H 3.013245 -3.533369 0.638866  
 H 5.630641 0.503721 -0.549183  
 H 5.457305 -3.655713 0.505757  
 H 6.793113 -1.643554 -0.076634

2<sub>1</sub>•AE<sub>t</sub> = -4652.507320 a.u.

Cu 0.276379 0.394241 0.733283  
 P -0.948759 0.029364 2.679989  
 P -1.200042 0.341521 -0.982328  
 C -2.759004 -0.199534 2.318756  
 C -3.270275 0.972331 1.453609  
 C -3.849156 0.552200 0.100776  
 C -2.934599 -0.317903 -0.772668  
 C -1.023352 1.525403 3.756490  
 C -0.589382 -1.290562 3.904323  
 C -0.588189 -0.634744 -2.418274  
 C -1.581511 1.977269 -1.737560  
 H -1.255612 -4.562266 4.567571  
 C 0.209754 -3.376360 5.605484  
 H 0.519971 -4.183830 6.262317  
 C 0.799043 -2.118449 5.712870  
 H 1.568902 -1.938818 6.458182  
 C 0.403559 -1.085860 4.872183  
 H 0.863020 -0.105833 4.974401  
 C -1.181363 -2.555654 3.809223  
 C -0.432694 2.712145 3.319708  
 H 0.120330 2.715903 2.383075  
 C -0.522095 3.867788 4.092487  
 H -0.051408 4.783168 3.745388  
 C -1.199247 3.845322 5.305903  
 H -1.265258 4.745492 5.910751  
 C -1.788894 2.662631 5.750356  
 H -2.314664 2.639891 6.700893  
 C -1.702762 1.509967 4.980298  
 H -2.153427 0.587101 5.338227  
 H -2.861624 -1.151883 1.788633  
 H -3.316741 -0.283644 3.258615  
 H -4.032399 1.530784 2.008064  
 H -2.461320 1.694305 1.273505  
 H -1.937488 -2.750220 3.056168  
 C 0.694542 -0.322378 -2.887991  
 H 1.252598 0.482112 -2.411716  
 C 1.248225 -1.020866 -3.952825  
 H 2.238432 -0.753603 -4.312728  
 C 0.539763 -2.060444 -4.553673  
 H 0.976007 -2.613158 -5.381044  
 C -0.726108 -2.388101 -4.084439  
 H -1.280586 -3.208062 -4.532669  
 C -1.289805 -1.679233 -3.025500  
 H -2.274518 -1.967336 -2.672956  
 C -0.784606 -3.587031 4.655504  
 C -2.276775 2.081584 -2.945994  
 H -2.551960 1.182239 -3.493403  
 C -2.593481 3.330433 -3.465989  
 H -3.117918 3.405035 -4.414460  
 C -2.217371 4.485332 -2.784324  
 H -2.448196 5.461294 -3.201601  
 C -1.525914 4.387428 -1.582069  
 H -1.213881 5.285706 -1.057221  
 C -1.207037 3.137309 -1.060197  
 H -0.632082 3.052383 -0.140378  
 H -3.398170 -0.410652 -1.762906  
 H -2.832594 -1.328707 -0.360030  
 H -4.784933 -0.002260 0.257518  
 H -4.112182 1.459581 -0.457529  
 C 2.181836 2.655172 -1.084143  
 C 1.843404 3.082971 -2.171847  
 C 1.424794 3.687208 -3.383596  
 C 0.777437 2.958953 -4.395296  
 C 0.362662 3.589264 -5.559969  
 C 1.647045 5.063405 -3.583494  
 C 1.227141 5.683868 -4.750108  
 C 0.581428 4.951253 -5.744506  
 H 0.254412 5.439692 -6.657821  
 H 0.590634 1.900278 -4.253359  
 H -0.141126 3.009939 -6.328941  
 H 2.146914 5.630645 -2.804434  
 H 1.404536 6.747164 -4.885983  
 C 1.948433 1.416852 1.067403  
 C 2.672379 2.282362 0.198347  
 C 2.562846 1.223682 2.322859  
 C 3.909318 2.858041 0.565832  
 C 3.785103 1.776224 2.695547  
 C 4.470827 2.598172 1.803959

2<sub>1</sub>•A (cont)

H 2.051452 0.606897 3.062764  
 H 4.416479 3.510424 -0.140621  
 H 4.200285 1.571855 3.680105  
 H 5.426048 3.039327 2.075122  
 C -0.292315 -5.888356 -2.818065  
 C -1.631606 -6.268466 -2.788941  
 C -2.514570 -5.641699 -1.912376  
 C -2.059393 -4.638315 -1.068332  
 C -0.718648 -4.248170 -1.103155  
 C 0.166709 -4.880113 -1.980876  
 H 0.396827 -6.377176 -3.500418  
 H -1.987103 -7.055997 -3.447354  
 H -3.558489 -5.939826 -1.885372  
 H -2.730187 -4.139041 -0.376026  
 H 1.204930 -4.570465 -2.016354  
 C -0.297880 -3.144222 -0.198632  
 O 1.005751 -2.854437 -0.375226  
 O -1.030822 -2.599980 0.602324  
 N 1.523407 -1.739710 0.446839  
 C 1.831492 -2.306589 1.783866  
 C 2.793658 -1.399445 -0.235436  
 H 2.197757 -1.454329 2.368125  
 C 2.884166 -3.403249 1.749374  
 H 0.901240 -2.657085 2.238999  
 C 3.822130 -2.521720 -0.206221  
 H 3.171529 -0.520252 0.297689  
 H 2.558447 -1.101680 -1.261865  
 H 3.146808 -3.689734 2.773143  
 H 2.499582 -4.296828 1.227776  
 H 4.772516 -2.156776 -0.609307  
 H 3.490676 -3.376861 -0.819521  
 O 4.084626 -2.951604 1.127780



## 3 (cont)

## TS[3-4•P]

## TS[3-4•P] (cont)

E<sub>t</sub> = -4652.531372 a.u.

|   |           |           |           |    |           |           |           |   |           |           |           |
|---|-----------|-----------|-----------|----|-----------|-----------|-----------|---|-----------|-----------|-----------|
| H | 2.451286  | -1.775985 | -1.787044 | Cu | 0.497444  | -0.361509 | 0.039295  | H | 2.308297  | -1.979747 | -1.580231 |
| H | 3.392469  | 2.958834  | -2.937917 | P  | -1.001992 | -0.484841 | 1.972724  | H | 3.145466  | 2.616256  | -3.197156 |
| H | 4.141986  | -1.236715 | -3.497426 | P  | -1.166937 | -0.103504 | -1.552138 | H | 3.678575  | -1.627070 | -3.586021 |
| H | 4.620184  | 1.137509  | -4.094044 | C  | -2.815678 | -0.866667 | 1.840514  | H | 4.151413  | 0.686467  | -4.396041 |
| C | -2.093307 | -6.096777 | -0.076905 | C  | -3.563985 | 0.009527  | 0.814855  | C | 0.564842  | -6.107198 | -2.656094 |
| C | -1.438356 | -7.297655 | -0.332992 | C  | -3.837194 | -0.629212 | -0.548465 | C | -0.538782 | -6.953627 | -2.572926 |
| C | -0.099470 | -7.284256 | -0.718638 | C  | -2.640371 | -1.221278 | -1.300101 | C | -1.563488 | -6.667688 | -1.673952 |
| C | 0.578662  | -6.078510 | -0.847641 | C  | -1.001687 | 1.112792  | 2.901746  | C | -1.483394 | -5.542461 | -0.861956 |
| C | -0.067558 | -4.866502 | -0.588431 | C  | -0.401978 | -1.592201 | 3.314486  | C | -0.386557 | -4.681209 | -0.948798 |
| C | -1.409514 | -4.891534 | -0.203043 | C  | -0.530738 | -0.628496 | -3.180675 | C | 0.637184  | -4.972999 | -1.853415 |
| H | -3.137835 | -6.099620 | 0.222947  | C  | -1.926999 | 1.537747  | -1.843029 | H | 1.368867  | -6.332889 | -3.351707 |
| H | -1.968919 | -8.240636 | -0.233044 | H  | 1.728187  | -4.193360 | 3.795995  | H | -0.600294 | -7.834075 | -3.206989 |
| H | 0.415980  | -8.219546 | -0.919800 | C  | 0.541867  | -3.271948 | 5.338450  | H | -2.426828 | -7.324328 | -1.607049 |
| H | 1.620514  | -6.042945 | -1.150076 | H  | 0.909725  | -3.925125 | 6.124822  | H | -2.266920 | -5.302851 | -0.149969 |
| H | -1.917987 | -3.954715 | 0.001311  | C  | -0.389875 | -2.279814 | 5.633865  | H | 1.482493  | -4.295098 | -1.923465 |
| C | 0.714980  | -3.569300 | -0.734837 | H  | -0.749611 | -2.154857 | 6.651188  | C | -0.369012 | -3.425064 | -0.102104 |
| O | 1.879492  | -3.650881 | -1.149934 | C  | -0.856574 | -1.440312 | 4.628476  | O | -1.258552 | -3.295079 | 0.762502  |
| O | 0.087592  | -2.493829 | -0.408662 | H  | -1.565023 | -0.652769 | 4.873560  | O | 0.540320  | -2.566131 | -0.372547 |
| N | 2.094340  | -0.230548 | 1.188308  | C  | 0.533327  | -2.585641 | 3.026105  | N | 2.244193  | -0.149799 | 0.915883  |
| C | 2.759384  | -1.528289 | 1.213772  | C  | 0.222352  | 1.497926  | 3.462861  | C | 3.178556  | -1.268342 | 0.915735  |
| C | 3.120883  | 0.803078  | 1.219523  | H  | 1.081994  | 0.851041  | 3.323484  | C | 2.962465  | 1.087043  | 1.193478  |
| H | 2.025323  | -2.337279 | 1.174962  | C  | 0.335080  | 2.655082  | 4.220438  | H | 2.644305  | -2.205342 | 0.727698  |
| C | 3.544657  | -1.641096 | 2.527234  | H  | 1.293481  | 2.923097  | 4.657068  | C | 3.872658  | -1.333797 | 2.277485  |
| H | 3.460747  | -1.664924 | 0.371946  | C  | -0.781379 | 3.463629  | 4.426733  | H | 3.963703  | -1.156087 | 0.145852  |
| C | 3.893976  | 0.665580  | 2.541243  | H  | -0.699770 | 4.365990  | 5.026313  | C | 3.734575  | 0.968171  | 2.515279  |
| H | 2.669767  | 1.802031  | 1.167114  | C  | -1.999793 | 3.102262  | 3.863420  | H | 2.262675  | 1.925483  | 1.271857  |
| H | 3.853465  | 0.717994  | 0.397171  | H  | -2.877550 | 3.723671  | 4.018813  | H | 3.695772  | 1.332988  | 0.403607  |
| H | 2.844705  | -1.601382 | 3.379135  | C  | -2.113769 | 1.935171  | 3.108893  | H | 3.130434  | -1.486629 | 3.078772  |
| H | 4.092701  | -2.588878 | 2.550577  | H  | -3.085432 | 1.669569  | 2.707745  | H | 4.590601  | -2.161056 | 2.288002  |
| H | 3.213997  | 0.818961  | 3.399463  | H  | -2.874754 | -1.929081 | 1.587855  | H | 3.042472  | 0.886831  | 3.369941  |
| H | 4.693724  | 1.413847  | 2.582432  | H  | -3.242495 | -0.743112 | 2.843645  | H | 4.348925  | 1.865896  | 2.648742  |
| O | 4.515410  | -0.604971 | 2.637309  | H  | -4.536293 | 0.292447  | 1.239178  | O | 4.615959  | -0.142378 | 2.514322  |
|   |           |           |           | H  | -3.035238 | 0.953972  | 0.652825  |   |           |           |           |
|   |           |           |           | H  | 0.880498  | -2.707051 | 2.007254  |   |           |           |           |
|   |           |           |           | C  | 0.014611  | 0.297916  | -4.073848 |   |           |           |           |
|   |           |           |           | H  | -0.018967 | 1.359356  | -3.846398 |   |           |           |           |
|   |           |           |           | C  | 0.616513  | -0.136761 | -5.248735 |   |           |           |           |
|   |           |           |           | H  | 1.045631  | 0.591967  | -5.930322 |   |           |           |           |
|   |           |           |           | C  | 0.692077  | -1.495472 | -5.539314 |   |           |           |           |
|   |           |           |           | H  | 1.175630  | -1.831423 | -6.452355 |   |           |           |           |
|   |           |           |           | C  | 0.156176  | -2.422097 | -4.650163 |   |           |           |           |
|   |           |           |           | H  | 0.217579  | -3.487075 | -4.856656 |   |           |           |           |
|   |           |           |           | C  | -0.451619 | -1.993578 | -3.476204 |   |           |           |           |
|   |           |           |           | H  | -0.836790 | -2.733860 | -2.783011 |   |           |           |           |
|   |           |           |           | C  | 1.001775  | -3.421380 | 4.034602  |   |           |           |           |
|   |           |           |           | C  | -2.702597 | 1.784758  | -2.981471 |   |           |           |           |
|   |           |           |           | H  | -2.786167 | 1.027075  | -3.756452 |   |           |           |           |
|   |           |           |           | C  | -3.357223 | 3.002323  | -3.128792 |   |           |           |           |
|   |           |           |           | H  | -3.949776 | 3.190995  | -4.019349 |   |           |           |           |
|   |           |           |           | C  | -3.257580 | 3.975289  | -2.136286 |   |           |           |           |
|   |           |           |           | H  | -3.771632 | 4.925398  | -2.251227 |   |           |           |           |
|   |           |           |           | C  | -2.493060 | 3.734034  | -1.000476 |   |           |           |           |
|   |           |           |           | H  | -2.398596 | 4.491485  | -0.227806 |   |           |           |           |
|   |           |           |           | C  | -1.823386 | 2.522634  | -0.860060 |   |           |           |           |
|   |           |           |           | H  | -1.209893 | 2.343880  | 0.019372  |   |           |           |           |
|   |           |           |           | H  | -2.969322 | -1.540559 | -2.296423 |   |           |           |           |
|   |           |           |           | H  | -2.274126 | -2.104821 | -0.768557 |   |           |           |           |
|   |           |           |           | H  | -4.559643 | -1.447134 | -0.421254 |   |           |           |           |
|   |           |           |           | H  | -4.325278 | 0.125550  | -1.178050 |   |           |           |           |
|   |           |           |           | C  | 1.617048  | 2.569871  | -1.108961 |   |           |           |           |
|   |           |           |           | C  | 1.163078  | 3.609377  | -0.672367 |   |           |           |           |
|   |           |           |           | C  | 0.539536  | 4.759325  | -0.139728 |   |           |           |           |
|   |           |           |           | C  | 0.063794  | 4.749871  | 1.183817  |   |           |           |           |
|   |           |           |           | C  | -0.621405 | 5.845283  | 1.688229  |   |           |           |           |
|   |           |           |           | C  | 0.320167  | 5.899363  | -0.933673 |   |           |           |           |
|   |           |           |           | C  | -0.368418 | 6.988066  | -0.418235 |   |           |           |           |
|   |           |           |           | C  | -0.845141 | 6.966360  | 0.891424  |   |           |           |           |
|   |           |           |           | H  | -1.388306 | 7.818531  | 1.289036  |   |           |           |           |
|   |           |           |           | H  | 0.223188  | 3.870479  | 1.800473  |   |           |           |           |
|   |           |           |           | H  | -0.989618 | 5.815658  | 2.709201  |   |           |           |           |
|   |           |           |           | H  | 0.676283  | 5.905705  | -1.958851 |   |           |           |           |
|   |           |           |           | H  | -0.541859 | 7.858757  | -1.044204 |   |           |           |           |
|   |           |           |           | C  | 1.963303  | 0.105042  | -1.217053 |   |           |           |           |
|   |           |           |           | C  | 2.187747  | 1.418332  | -1.693766 |   |           |           |           |
|   |           |           |           | C  | 2.513646  | -0.969619 | -1.915985 |   |           |           |           |
|   |           |           |           | C  | 2.985746  | 1.600594  | -2.846565 |   |           |           |           |
|   |           |           |           | C  | 3.282914  | -0.765918 | -3.054346 |   |           |           |           |
|   |           |           |           | C  | 3.538789  | 0.525122  | -3.514134 |   |           |           |           |





| 4•T (cont) |          |           | 4•A                                |    |           | 4•Â (cont) |           |   |           |           |           |
|------------|----------|-----------|------------------------------------|----|-----------|------------|-----------|---|-----------|-----------|-----------|
|            |          |           | E <sub>t</sub> = -4534.011139 a.u. |    |           |            |           |   |           |           |           |
| H          | 3.405254 | 0.000112  | -1.376306                          | Cu | 0.033178  | -0.305977  | 0.383866  | H | 3.255064  | 2.656892  | 1.070338  |
| H          | 4.650050 | 1.268157  | -1.441155                          | P  | -1.339847 | -0.413953  | 2.217702  | O | 4.160174  | 1.049047  | 2.036285  |
| C          | 4.153845 | 0.544386  | 0.593482                           | P  | -1.185476 | -0.109290  | -1.566011 | C | 2.609462  | -3.312602 | -3.451013 |
| H          | 4.242431 | -0.535229 | 0.735067                           | C  | -2.738795 | -1.643375  | 2.039833  | H | 3.950622  | -3.596765 | -5.101530 |
| H          | 5.097116 | 1.007257  | 0.898830                           | C  | -2.933040 | -2.103993  | 0.592052  | H | 2.420961  | -5.121417 | -6.316991 |
| C          | 2.980775 | 1.111661  | 1.414732                           | C  | -3.492716 | -1.048570  | -0.382929 | H | 0.206317  | -5.684938 | -5.350488 |
| H          | 2.520842 | 0.370282  | 2.071905                           | C  | -2.763673 | -1.078420  | -1.737636 | H | -0.468581 | -4.712375 | -3.158859 |
| H          | 3.280986 | 1.997813  | 1.992099                           | C  | -2.111751 | 1.230938   | 2.527922  | H | 3.273545  | -2.636858 | -2.924311 |
| C          | 2.608231 | 0.910715  | -3.401220                          | C  | -0.683940 | -0.799695  | 3.900916  | C | 0.894800  | -3.090424 | -1.602975 |
| C          | 2.268306 | 2.250488  | -3.587393                          | C  | -0.249783 | -0.399284  | -3.115664 | O | 1.902711  | -2.462114 | -0.960373 |
|            |          |           |                                    | C  | -1.806705 | 1.605187   | -1.845158 | O | -0.226886 | -3.234695 | -1.163356 |
|            |          |           |                                    | H  | -3.408277 | -0.039404  | 0.042715  | N | 1.580573  | -1.817648 | 0.339104  |
|            |          |           |                                    | H  | -3.375709 | -0.642185  | -2.536158 | C | 1.392151  | -2.900677 | 1.347231  |
|            |          |           |                                    | H  | -2.518241 | -2.112034  | -2.009728 | C | 2.850447  | -1.100691 | 0.635977  |
|            |          |           |                                    | H  | -2.438036 | -2.507597  | 2.644583  | H | 1.186786  | -2.371632 | 2.285753  |
|            |          |           |                                    | H  | -3.667351 | -1.261215  | 2.481480  | C | 2.621224  | -3.779030 | 1.516012  |
|            |          |           |                                    | H  | -1.963213 | -2.452059  | 0.221510  | H | 0.506972  | -3.480556 | 1.071746  |
|            |          |           |                                    | H  | -3.592927 | -2.981593  | 0.590730  | C | 4.032051  | -2.034200 | -0.849321 |
|            |          |           |                                    | H  | -4.565804 | -1.212692  | -0.540175 | H | 2.646904  | -0.501880 | 1.531511  |
|            |          |           |                                    | C  | -3.464701 | 1.515084   | 2.335117  | H | 3.031199  | -0.393042 | -0.178950 |
|            |          |           |                                    | C  | -3.069388 | 3.845546   | 2.824631  | H | 2.455628  | -4.482242 | 2.338805  |
|            |          |           |                                    | C  | -1.241285 | 2.271868   | 2.880086  | H | 2.818767  | -4.359806 | 0.598541  |
|            |          |           |                                    | C  | -1.718647 | 3.567740   | 3.025035  | H | 4.891010  | -1.450885 | 1.195788  |
|            |          |           |                                    | H  | -1.025584 | 4.363743   | 3.282780  | H | 4.312030  | -2.543810 | -0.087555 |
|            |          |           |                                    | H  | -0.181537 | 2.071804   | 3.022838  | O | 3.761094  | -3.001011 | 1.863970  |
|            |          |           |                                    | C  | -3.939164 | 2.816415   | 2.484840  |   |           |           |           |
|            |          |           |                                    | H  | -4.164996 | 0.733318   | 2.058783  |   |           |           |           |
|            |          |           |                                    | H  | -3.440543 | 4.861010   | 2.931009  |   |           |           |           |
|            |          |           |                                    | H  | -4.993870 | 3.022828   | 2.326169  |   |           |           |           |
|            |          |           |                                    | C  | 1.006425  | 0.216567   | -3.206331 |   |           |           |           |
|            |          |           |                                    | C  | 1.315436  | -0.711133  | -5.411698 |   |           |           |           |
|            |          |           |                                    | C  | -0.704908 | -1.179590  | -4.180025 |   |           |           |           |
|            |          |           |                                    | C  | 0.077422  | -1.335647  | -5.321926 |   |           |           |           |
|            |          |           |                                    | H  | -0.281364 | -1.954291  | -6.139676 |   |           |           |           |
|            |          |           |                                    | H  | -1.669731 | -1.675483  | -4.125013 |   |           |           |           |
|            |          |           |                                    | C  | 1.777388  | 0.066672   | -4.351155 |   |           |           |           |
|            |          |           |                                    | H  | 1.367441  | 0.814587   | -2.370346 |   |           |           |           |
|            |          |           |                                    | H  | 1.924921  | -0.837312  | -6.302020 |   |           |           |           |
|            |          |           |                                    | H  | 2.746506  | 0.554024   | -4.414589 |   |           |           |           |
|            |          |           |                                    | C  | -1.787679 | 2.527063   | -0.798780 |   |           |           |           |
|            |          |           |                                    | C  | -2.793124 | 4.191750   | -2.224230 |   |           |           |           |
|            |          |           |                                    | C  | -2.314875 | 1.992953   | -3.090489 |   |           |           |           |
|            |          |           |                                    | C  | -2.805801 | 3.278495   | -3.278047 |   |           |           |           |
|            |          |           |                                    | H  | -3.192520 | 3.572494   | -4.249912 |   |           |           |           |
|            |          |           |                                    | H  | -2.308376 | 1.292018   | -3.922391 |   |           |           |           |
|            |          |           |                                    | C  | -2.282709 | 3.815279   | -0.988009 |   |           |           |           |
|            |          |           |                                    | H  | -1.358005 | 2.248576   | 0.157445  |   |           |           |           |
|            |          |           |                                    | H  | -3.172513 | 5.198879   | -2.374113 |   |           |           |           |
|            |          |           |                                    | H  | -2.249760 | 4.522115   | -0.164152 |   |           |           |           |
|            |          |           |                                    | C  | -1.497755 | -1.312355  | 4.917118  |   |           |           |           |
|            |          |           |                                    | C  | 0.379332  | -1.328630  | 6.432377  |   |           |           |           |
|            |          |           |                                    | C  | 0.661649  | -0.536406  | 4.169956  |   |           |           |           |
|            |          |           |                                    | C  | 1.187101  | -0.798498  | 5.432712  |   |           |           |           |
|            |          |           |                                    | H  | 2.233970  | -0.585439  | 5.628875  |   |           |           |           |
|            |          |           |                                    | H  | 1.287166  | -0.087051  | 3.400464  |   |           |           |           |
|            |          |           |                                    | C  | -0.966007 | -1.580257  | 6.173249  |   |           |           |           |
|            |          |           |                                    | H  | -2.554108 | -1.494217  | 4.739491  |   |           |           |           |
|            |          |           |                                    | H  | 0.792105  | -1.538727  | 7.415135  |   |           |           |           |
|            |          |           |                                    | H  | -1.606312 | -1.979445  | 6.954985  |   |           |           |           |
|            |          |           |                                    | C  | 1.420103  | 5.475491   | -0.538382 |   |           |           |           |
|            |          |           |                                    | C  | 1.934132  | 6.289615   | 0.467869  |   |           |           |           |
|            |          |           |                                    | C  | 2.368870  | 5.721861   | 1.663917  |   |           |           |           |
|            |          |           |                                    | C  | 2.287079  | 4.347191   | 1.852752  |   |           |           |           |
|            |          |           |                                    | C  | 1.769659  | 3.525872   | 0.848264  |   |           |           |           |
|            |          |           |                                    | C  | 1.338599  | 4.100282   | -0.349453 |   |           |           |           |
|            |          |           |                                    | H  | 1.077591  | 5.913905   | -1.472011 |   |           |           |           |
|            |          |           |                                    | H  | 1.996720  | 7.364614   | 0.320763  |   |           |           |           |
|            |          |           |                                    | H  | 2.772262  | 6.354640   | 2.450062  |   |           |           |           |
|            |          |           |                                    | H  | 2.616512  | 3.882729   | 2.777269  |   |           |           |           |
|            |          |           |                                    | H  | 0.927706  | 3.455657   | -1.119601 |   |           |           |           |
|            |          |           |                                    | C  | 1.637709  | 2.041045   | 1.090515  |   |           |           |           |
|            |          |           |                                    | O  | 2.015867  | 1.579367   | 2.185274  |   |           |           |           |
|            |          |           |                                    | O  | 1.107311  | 1.370056   | 0.134938  |   |           |           |           |
|            |          |           |                                    | C  | 2.983655  | -3.849085  | -4.676454 |   |           |           |           |
|            |          |           |                                    | C  | 2.122633  | -4.701854  | -5.360355 |   |           |           |           |
|            |          |           |                                    | C  | 0.878525  | -5.018169  | -4.818492 |   |           |           |           |
|            |          |           |                                    | C  | 0.497368  | -4.482652  | -3.597311 |   |           |           |           |
|            |          |           |                                    | C  | 1.361993  | -3.628544  | -2.907155 |   |           |           |           |



| 4•S                                |           |           | 4•S (cont) |   |          | TS[4•S <sub>2</sub> -1•HOBz]       |           |    |           |           |           |
|------------------------------------|-----------|-----------|------------|---|----------|------------------------------------|-----------|----|-----------|-----------|-----------|
| E <sub>t</sub> = -4135.109114 a.u. |           |           |            |   |          | E <sub>t</sub> = -4135.089781 a.u. |           |    |           |           |           |
| Cu                                 | 0.050232  | -1.060474 | -0.263276  | C | 3.059269 | -1.025424                          | 2.059612  | Cu | 0.446370  | -0.285257 | -0.323306 |
| P                                  | -1.316408 | -1.190953 | 1.662686   | C | 4.086058 | -0.247351                          | 2.570107  | P  | -0.870880 | -0.361055 | 1.507030  |
| P                                  | -1.303762 | -0.937247 | -2.097870  | C | 5.115501 | 0.193071                           | 1.741367  | P  | -0.809333 | 0.013214  | -2.142717 |
| C                                  | -2.555827 | -2.600644 | 1.638860   | H | 5.908242 | 0.204829                           | -0.259632 | C  | -2.170217 | -1.706163 | 1.418372  |
| C                                  | -2.769638 | -3.104134 | 0.209998   | H | 4.067801 | -1.169137                          | -1.189758 | C  | -2.270795 | -2.326124 | 0.017658  |
| C                                  | -3.472205 | -2.080214 | -0.702593  | H | 2.246174 | -1.352902                          | 2.696982  | C  | -2.954547 | -1.439806 | -1.047278 |
| C                                  | -2.839227 | -1.993904 | -2.100200  | H | 5.906272 | 0.820595                           | 2.141519  | C  | -2.134659 | -1.275409 | -2.337663 |
| C                                  | -2.329593 | 0.303440  | 1.999014   | H | 4.072503 | 0.029592                           | 3.620333  | C  | -1.727879 | 1.227420  | 1.835445  |
| C                                  | -0.421738 | -1.452428 | 3.241949   | H | 0.744366 | -3.746168                          | -0.805409 | C  | -0.051881 | -0.672446 | 3.122949  |
| C                                  | -0.578749 | -1.300536 | -3.744941  |   |          |                                    |           | C  | -0.032305 | 0.030326  | -3.805982 |
| C                                  | -1.969139 | 0.761835  | -2.321183  |   |          |                                    |           | C  | -1.750255 | 1.589607  | -2.050220 |
| H                                  | -3.452394 | -1.090278 | -0.227676  |   |          |                                    |           | H  | -3.167705 | -0.444589 | -0.636536 |
| H                                  | -3.546415 | -1.605988 | -2.842893  |   |          |                                    |           | H  | -2.768214 | -1.021807 | -3.196675 |
| H                                  | -2.540301 | -2.991643 | -2.445577  |   |          |                                    |           | H  | -1.623485 | -2.212281 | -2.594034 |
| H                                  | -2.167938 | -3.403223 | 2.275047   |   |          |                                    |           | H  | -1.841293 | -2.470902 | 2.131974  |
| H                                  | -3.501404 | -2.267655 | 2.083398   |   |          |                                    |           | H  | -3.141830 | -1.341546 | 1.774984  |
| H                                  | -1.788475 | -3.351595 | -0.214331  |   |          |                                    |           | H  | -1.257262 | -2.582516 | -0.312336 |
| H                                  | -3.345364 | -4.038446 | 0.232529   |   |          |                                    |           | H  | -2.809523 | -3.278176 | 0.101305  |
| H                                  | -4.534265 | -2.338799 | -0.798948  |   |          |                                    |           | H  | -3.932239 | -1.864857 | -1.305213 |
| C                                  | -2.119857 | 1.442266  | 1.217649   |   |          |                                    |           | C  | -3.067188 | 1.475558  | 1.528321  |
| C                                  | -3.860646 | 2.599938  | 2.422781   |   |          |                                    |           | C  | -2.813350 | 3.790976  | 2.160238  |
| C                                  | -3.301006 | 0.329124  | 3.007440   |   |          |                                    |           | C  | -0.933021 | 2.286448  | 2.297387  |
| C                                  | -4.063630 | 1.471003  | 3.215934   |   |          |                                    |           | C  | -1.474513 | 3.552913  | 2.465796  |
| H                                  | -4.815265 | 1.483478  | 4.000353   |   |          |                                    |           | H  | -0.846413 | 4.359902  | 2.833232  |
| H                                  | -3.451933 | -0.540655 | 3.642577   |   |          |                                    |           | H  | 0.117147  | 2.112663  | 2.520575  |
| C                                  | -2.887511 | 2.585400  | 1.430876   |   |          |                                    |           | C  | -3.604505 | 2.750414  | 1.689086  |
| H                                  | -1.345488 | 1.437586  | 0.455368   |   |          |                                    |           | H  | -3.707280 | 0.679984  | 1.159476  |
| H                                  | -4.460192 | 3.491327  | 2.585878   |   |          |                                    |           | H  | -3.234487 | 4.784526  | 2.284385  |
| H                                  | -2.719949 | 3.461075  | 0.810679   |   |          |                                    |           | H  | -4.646808 | 2.927101  | 1.439401  |
| C                                  | 0.766254  | -1.660400 | -3.833490  |   |          |                                    |           | C  | -0.632196 | 0.634990  | -4.914163 |
| C                                  | 0.547394  | -1.906979 | -6.223871  |   |          |                                    |           | C  | 1.221466  | -0.047813 | -6.253882 |
| C                                  | -1.353286 | -1.226672 | -4.907851  |   |          |                                    |           | C  | 1.204189  | -0.605672 | -3.951499 |
| C                                  | -0.792633 | -1.532806 | -6.141252  |   |          |                                    |           | C  | 1.824056  | -0.647925 | -5.196814 |
| H                                  | -1.398399 | -1.471415 | -7.040984  |   |          |                                    |           | H  | 2.786931  | -1.139601 | -5.301764 |
| H                                  | -2.392340 | -0.910854 | -4.852619  |   |          |                                    |           | H  | 1.678377  | -1.058155 | -3.082217 |
| C                                  | 1.324617  | -1.964036 | -5.072584  |   |          |                                    |           | C  | -0.005784 | 0.595350  | -6.155049 |
| H                                  | 1.376869  | -1.659580 | -2.935667  |   |          |                                    |           | H  | -1.581261 | 1.153816  | -4.804037 |
| H                                  | 0.986118  | -2.141568 | -7.189754  |   |          |                                    |           | H  | 1.711616  | -0.072087 | -7.267636 |
| H                                  | 2.374729  | -2.234180 | -5.136628  |   |          |                                    |           | H  | -0.473663 | 1.072977  | -7.011386 |
| C                                  | -1.041322 | 1.775088  | -2.596119  |   |          |                                    |           | C  | -3.061507 | 1.757747  | -2.504956 |
| C                                  | -2.803369 | 3.424448  | -2.537343  |   |          |                                    |           | C  | -3.047348 | 4.053135  | -1.763077 |
| C                                  | -3.315169 | 1.097761  | -2.154893  |   |          |                                    |           | C  | -1.100755 | 2.668394  | -1.437804 |
| C                                  | -3.727911 | 2.423401  | -2.263750  |   |          |                                    |           | C  | -1.742770 | 3.893219  | -1.305363 |
| H                                  | -4.777230 | 2.670316  | -2.128202  |   |          |                                    |           | H  | -1.229302 | 4.718438  | -0.820852 |
| H                                  | -4.057544 | 0.338101  | -1.931826  |   |          |                                    |           | H  | -0.094661 | 2.535614  | -1.045619 |
| C                                  | -1.459975 | 3.094511  | -2.706397  |   |          |                                    |           | C  | -3.706301 | 2.983016  | -2.359236 |
| H                                  | 0.010043  | 1.522140  | -2.714513  |   |          |                                    |           | H  | -3.595889 | 0.933711  | -2.969139 |
| H                                  | -3.126847 | 4.458433  | -2.619582  |   |          |                                    |           | H  | -3.553870 | 5.006995  | -1.644843 |
| H                                  | -0.729366 | 3.869627  | -2.919646  |   |          |                                    |           | H  | -4.727441 | 3.099358  | -2.711731 |
| C                                  | 0.123891  | -2.710052 | 3.533811   |   |          |                                    |           | C  | -0.764844 | -0.629081 | 4.326501  |
| C                                  | 1.220262  | -1.815174 | 5.487311   |   |          |                                    |           | C  | 1.252766  | -1.133882 | 5.547514  |
| C                                  | -0.112289 | -0.374629 | 4.079095   |   |          |                                    |           | C  | 1.316275  | -0.948870 | 3.143628  |
| C                                  | 0.701281  | -0.557831 | 5.192070   |   |          |                                    |           | C  | 1.966248  | -1.175137 | 4.355024  |
| H                                  | 0.929746  | 0.289474  | 5.832558   |   |          |                                    |           | H  | 3.032882  | -1.380016 | 4.360975  |
| H                                  | -0.506085 | 0.612540  | 3.855066   |   |          |                                    |           | H  | 1.869091  | -0.994610 | 2.208791  |
| C                                  | 0.928376  | -2.890763 | 4.652818   |   |          |                                    |           | C  | -0.115407 | -0.864323 | 5.531932  |
| H                                  | -0.056428 | -3.553488 | 2.871972   |   |          |                                    |           | H  | -1.827296 | -0.395985 | 4.319187  |
| H                                  | 1.854317  | -1.955560 | 6.357748   |   |          |                                    |           | H  | 1.760492  | -1.307946 | 6.492100  |
| H                                  | 1.341081  | -3.873045 | 4.864329   |   |          |                                    |           | H  | -0.673895 | -0.829867 | 6.463199  |
| C                                  | 3.346392  | 3.821829  | 1.400923   |   |          |                                    |           | C  | 3.939045  | 4.525965  | 1.582568  |
| C                                  | 4.298429  | 4.332398  | 0.521905   |   |          |                                    |           | C  | 5.285698  | 4.333728  | 1.884379  |
| C                                  | 4.398372  | 3.815341  | -0.768247  |   |          |                                    |           | C  | 5.876375  | 3.090545  | 1.671455  |
| C                                  | 3.554529  | 2.788343  | -1.173648  |   |          |                                    |           | C  | 5.125460  | 2.039345  | 1.158890  |
| C                                  | 2.599494  | 2.272345  | -0.295860  |   |          |                                    |           | C  | 3.775064  | 2.229389  | 0.856620  |
| C                                  | 2.498685  | 2.797883  | 0.993447   |   |          |                                    |           | C  | 3.185519  | 3.478148  | 1.070786  |
| H                                  | 3.268041  | 4.222308  | 2.408274   |   |          |                                    |           | H  | 3.478136  | 5.495763  | 1.747280  |
| H                                  | 4.961330  | 5.132387  | 0.841019   |   |          |                                    |           | H  | 5.874707  | 5.153694  | 2.285816  |
| H                                  | 5.139158  | 4.213462  | -1.456689  |   |          |                                    |           | H  | 6.926045  | 2.940938  | 1.907225  |
| H                                  | 3.622893  | 2.358210  | -2.168320  |   |          |                                    |           | H  | 5.571188  | 1.064934  | 0.989031  |
| H                                  | 1.758898  | 2.378341  | 1.667812   |   |          |                                    |           | H  | 2.134602  | 3.606329  | 0.830062  |
| C                                  | 1.735275  | 1.118236  | -0.730407  |   |          |                                    |           | C  | 2.943638  | 1.111999  | 0.322501  |
| O                                  | 1.936612  | 0.587493  | -1.838142  |   |          |                                    |           | O  | 1.729561  | 1.317550  | 0.088460  |
| O                                  | 0.842333  | 0.746980  | 0.116799   |   |          |                                    |           | O  | 3.537140  | -0.019773 | 0.149999  |
| C                                  | 1.132133  | -2.837611 | -0.392878  |   |          |                                    |           | C  | 1.750726  | -1.847700 | -0.366450 |
| C                                  | 2.000973  | -2.146143 | 0.144694   |   |          |                                    |           | C  | 1.461531  | -3.047341 | -0.357745 |
| C                                  | 3.057251  | -1.377678 | 0.699955   |   |          |                                    |           | C  | 0.987444  | -4.380219 | -0.295542 |
| C                                  | 4.097784  | -0.931583 | -0.132383  |   |          |                                    |           | H  | 2.737465  | -0.843893 | -0.146745 |
| C                                  | 5.118536  | -0.154111 | 0.393289   |   |          |                                    |           | C  | 1.037210  | -5.233052 | -1.413354 |

TS[4•S<sub>2</sub>-1•HOBz] (cont)

C 0.510252 -6.515203 -1.343660  
 C 0.399998 -4.859453 0.892178  
 C -0.131571 -6.139276 0.949124  
 C -0.080259 -6.972477 -0.167189  
 H -0.587149 -6.492175 1.870319  
 H 0.369552 -4.205069 1.758977  
 H 1.491046 -4.869056 -2.329930  
 H 0.556362 -7.163154 -2.214508  
 H -0.496636 -7.974390 -0.119485

## 1•HOBz

E<sub>t</sub> = -4135.100566 a.u.

Cu 0.163405 -0.514567 0.462213  
 P -1.208368 -0.563531 2.243723  
 P -1.112464 -0.277812 -1.397282  
 C -2.186419 -2.161353 2.108126  
 C -2.145990 -2.792410 0.709719  
 C -2.977283 -2.074839 -0.378075  
 C -2.183006 -1.774504 -1.660923  
 C -2.422904 0.784449 2.529954  
 C -0.443213 -0.741577 3.908113  
 C -0.162867 -0.098446 -2.955097  
 C -2.314888 1.111599 -1.432778  
 H -3.385188 -1.131342 0.008641  
 H -2.843500 -1.626996 -2.522477  
 H -1.517327 -2.610609 -1.909431  
 H -1.698774 -2.836831 2.820487  
 H -3.213454 -2.019949 2.467475  
 H -1.094690 -2.847135 0.397072  
 H -2.489779 -3.830769 0.798136  
 H -3.849823 -2.685932 -0.638691  
 C -3.781813 0.696513 2.222125  
 C -4.108139 3.004600 2.846675  
 C -1.916409 2.008542 2.990339  
 C -2.752447 3.103556 3.155742  
 H -2.343771 4.040393 3.524401  
 H -0.857673 2.097622 3.224514  
 C -4.616900 1.800675 2.376445  
 H -4.207502 -0.233174 1.858397  
 H -4.761576 3.863480 2.970235  
 H -5.670666 1.713767 2.127476  
 C 0.886352 -1.001615 -3.171638  
 C 1.484658 0.161009 -5.197818  
 C -0.364416 0.945893 -3.861730  
 C 0.459385 1.073845 -4.975736  
 H 0.304917 1.899135 -5.664995  
 H -1.153513 1.671814 -3.688715  
 C 1.694810 -0.878022 -4.294114  
 H 1.093866 -1.776225 -2.435415  
 H 2.130029 0.267401 -6.065295  
 H 2.506707 -1.582727 -4.449718  
 C -2.066111 2.201843 -0.593622  
 C -4.074393 3.286674 -1.368259  
 C -3.455903 1.125097 -2.241560  
 C -4.332725 2.204281 -2.205046  
 H -5.218095 2.201001 -2.834760  
 H -3.664794 0.297176 -2.913082  
 C -2.937131 3.285746 -0.567755  
 H -1.186703 2.190588 0.043769  
 H -4.761951 4.127448 -1.339050  
 H -2.735777 4.119746 0.097978  
 C -1.165734 -0.542773 5.089103  
 C 0.772330 -1.160878 6.385116  
 C 0.891899 -1.148182 3.975032  
 C 1.493548 -1.360415 5.212491  
 H 2.532066 -1.675872 5.256164  
 H 1.452173 -1.300019 3.053846  
 C -0.557676 -0.750539 6.321739  
 H -2.201439 -0.215421 5.043578  
 H 1.245486 -1.321156 7.349929  
 H -1.122950 -0.591737 7.235918  
 C 1.451792 4.555240 -2.939393  
 C 2.446969 4.449789 -3.909405  
 C 3.341147 3.383547 -3.878038  
 C 3.243332 2.419466 -2.882742  
 C 2.247348 2.524692 -1.908554  
 C 1.352538 3.597737 -1.940875  
 H 0.751703 5.385158 -2.965031  
 H 2.524157 5.199999 -4.691589  
 H 4.113265 3.298782 -4.637170  
 H 3.922700 1.574803 -2.861696  
 H 0.577349 3.656345 -1.183670  
 C 2.073501 1.485075 -0.865320  
 O 1.157871 1.525330 -0.042738  
 O 2.965001 0.506369 -0.922205  
 C 1.679516 -1.679463 0.450374  
 C 2.638503 -2.456017 0.445725  
 C 3.735451 -3.354464 0.449763  
 H 2.661091 -0.250167 -0.336616  
 C 5.002845 -2.951053 -0.011234

## 1•HOBz (cont)

C 6.071706 -3.835720 -0.002810  
 C 3.582667 -4.673998 0.916065  
 C 4.657621 -5.551161 0.918227  
 C 5.907392 -5.139440 0.460213  
 H 4.520205 -6.565863 1.282060  
 H 2.608699 -4.992231 1.274724  
 H 5.130868 -1.935060 -0.372949  
 H 7.042841 -3.505411 -0.361349  
 H 6.746433 -5.828821 0.464630

| 2•B                       |           |           | 2•B (cont) |   |           | TS[2•B-6]                  |           |    |           |           |            |
|---------------------------|-----------|-----------|------------|---|-----------|----------------------------|-----------|----|-----------|-----------|------------|
| $E_i = -4176.205843$ a.u. |           |           |            |   |           | $E_i = -4176.1950838$ a.u. |           |    |           |           |            |
| Cu                        | 0.312899  | -0.156961 | -0.336777  | H | -0.062334 | 2.565666                   | -1.723611 | Cu | 0.401925  | -0.506128 | -0.783641  |
| P                         | -1.182521 | -0.278124 | 1.417462   | H | 3.396093  | 3.324635                   | 1.727818  | P  | -1.081846 | -0.675077 | 1.022764   |
| P                         | -1.291873 | -0.024409 | -2.291287  | H | 0.786062  | 4.825434                   | -1.334707 | P  | -1.119190 | -0.381983 | -2.571571  |
| C                         | -2.589745 | -1.487506 | 1.262561   | H | 2.499420  | 5.240345                   | 0.425406  | C  | -2.485052 | -1.902727 | 0.852150   |
| C                         | -3.262486 | -1.493048 | -0.119218  | C | 0.981565  | -1.993513                  | -0.759380 | C  | -3.143160 | -1.984355 | -0.528390  |
| C                         | -2.471920 | -2.322806 | -1.153513  | C | 1.836729  | -1.040483                  | -1.077021 | C  | -2.271285 | -2.733989 | -3.1558372 |
| C                         | -2.251818 | -1.625452 | -2.496987  | C | 1.269062  | -3.329447                  | -1.019424 | C  | -2.051629 | -1.970567 | -2.864200  |
| C                         | -2.000981 | 1.314989  | 1.808490   | C | 3.071326  | -1.189369                  | -1.667283 | C  | -1.940864 | 0.876019  | 1.503043   |
| C                         | -0.460729 | -0.811434 | 3.016245   | C | 2.511158  | -3.571130                  | -1.632241 | C  | -0.415743 | -1.326097 | 2.604765   |
| C                         | -0.287680 | 0.065707  | -3.823958  | C | 3.389401  | -2.529420                  | -1.948112 | C  | -0.351690 | -0.090458 | -2.413641  |
| C                         | -2.590185 | 1.254936  | -2.570534  | H | 0.602169  | -4.155861                  | -0.779141 | C  | -2.362372 | 0.966043  | -2.427668  |
| H                         | -1.486276 | -2.561806 | -0.740989  | H | 3.746605  | -0.373808                  | -1.906719 | H  | -1.283399 | -2.934372 | -1.124143  |
| H                         | -1.675400 | -2.274653 | -3.165056  | H | 2.800586  | -4.593853                  | -1.863722 | H  | -1.416698 | -2.556169 | -3.539914  |
| H                         | -3.203621 | -1.406336 | -2.995690  | H | 4.341810  | -2.761073                  | -2.419027 | H  | -2.993082 | -1.785875 | -3.953415  |
| H                         | -3.298879 | -1.285454 | 2.075176   |   |           |                            |           | H  | -3.210468 | -1.675801 | 1.644080   |
| H                         | -2.154906 | -2.472447 | 1.473549   |   |           |                            |           | H  | -2.044743 | -2.874217 | 1.108105   |
| H                         | -3.389802 | -0.462699 | -0.477074  |   |           |                            |           | H  | -3.377682 | -0.978013 | -0.895382  |
| H                         | -4.278961 | -1.892312 | -0.015325  |   |           |                            |           | H  | -4.111043 | -2.490024 | -0.419741  |
| H                         | -2.981732 | -3.278940 | -1.328686  |   |           |                            |           | H  | -2.718224 | -3.709362 | -1.787882  |
| C                         | -3.386711 | 1.496084  | 1.781168   |   |           |                            |           | C  | -3.307401 | 1.086839  | 1.297789   |
| C                         | -3.114727 | 3.842789  | 2.272028   |   |           |                            |           | C  | -3.108370 | 3.358507  | 2.089008   |
| C                         | -1.178123 | 2.418196  | 2.073864   |   |           |                            |           | C  | -1.166676 | 1.928677  | 2.009618   |
| C                         | -1.732956 | 3.669645  | 2.307751   |   |           |                            |           | C  | -1.746495 | 3.156395  | 2.301579   |
| H                         | -1.078589 | 4.513193  | 2.506904   |   |           |                            |           | H  | -1.128195 | 3.959616  | 2.692929   |
| H                         | -0.098683 | 2.299700  | 2.085747   |   |           |                            |           | H  | -0.105201 | 1.780078  | 2.182777   |
| C                         | -3.938568 | 2.753631  | 2.010789   |   |           |                            |           | C  | -3.885026 | 2.319355  | 1.589992   |
| H                         | -4.051210 | 0.665530  | 1.566600   |   |           |                            |           | H  | -3.935568 | 0.300134  | 0.893075   |
| H                         | -3.546719 | 4.824043  | 2.447883   |   |           |                            |           | H  | -3.559286 | 4.322251  | 2.308941   |
| H                         | -5.017246 | 2.878793  | 1.979571   |   |           |                            |           | H  | -4.946119 | 2.468120  | 1.411344   |
| C                         | 0.543248  | -1.011746 | -4.159203  |   |           |                            |           | C  | 0.749843  | -0.888496 | -4.552856  |
| C                         | 1.473386  | 0.243858  | -5.997694  |   |           |                            |           | C  | 1.031071  | 0.350208  | -6.603426  |
| C                         | -0.203519 | 1.241506  | -4.577746  |   |           |                            |           | C  | -0.745203 | 0.935313  | -5.076089  |
| C                         | 0.668058  | 1.326122  | -5.658137  |   |           |                            |           | C  | -0.053850 | 1.152383  | -6.265148  |
| H                         | 0.717089  | 2.245050  | -6.235490  |   |           |                            |           | H  | -0.363597 | 1.956998  | -6.926205  |
| H                         | -0.825687 | 2.095199  | -4.324902  |   |           |                            |           | H  | -1.582531 | 1.575022  | -4.812313  |
| C                         | 1.409207  | -0.922957 | -5.242086  |   |           |                            |           | C  | 1.429400  | -0.672656 | -5.744991  |
| H                         | 0.538031  | -1.919064 | -3.560601  |   |           |                            |           | H  | 1.096069  | -1.655797 | -3.862496  |
| H                         | 2.153904  | 0.312236  | -6.841488  |   |           |                            |           | H  | 1.573300  | 0.527910  | -7.527673  |
| H                         | 2.046120  | -1.768751 | -5.484964  |   |           |                            |           | H  | 2.286097  | -1.292213 | -5.993879  |
| C                         | -2.796871 | 2.238074  | -1.600821  |   |           |                            |           | C  | -1.984532 | 2.097018  | -1.695166  |
| C                         | -4.587733 | 3.185017  | -2.908268  |   |           |                            |           | C  | -4.118507 | 3.127139  | -2.130015  |
| C                         | -3.394728 | 1.251697  | -3.717215  |   |           |                            |           | C  | -3.635437 | 0.930121  | -3.006266  |
| C                         | -4.385120 | 2.210805  | -3.885084  |   |           |                            |           | C  | -4.511231 | 2.000047  | -2.847708  |
| H                         | -5.000353 | 2.200933  | -4.780496  |   |           |                            |           | H  | -5.501455 | 1.955274  | -3.922181  |
| H                         | -3.233279 | 0.503856  | -4.490090  |   |           |                            |           | H  | -3.954012 | 0.069266  | -3.586804  |
| C                         | -3.793496 | 3.197260  | -1.768114  |   |           |                            |           | C  | -2.850884 | 3.175469  | -1.561163  |
| H                         | -2.177969 | 2.256002  | -0.708386  |   |           |                            |           | H  | -1.009624 | 2.128798  | -1.219508  |
| H                         | -5.363705 | 3.933720  | -3.041173  |   |           |                            |           | H  | -4.803194 | 3.962122  | -2.009505  |
| H                         | -3.942320 | 3.950464  | -0.999883  |   |           |                            |           | H  | -2.537204 | 4.040252  | -0.984235  |
| C                         | -0.865843 | -0.275454 | 4.241110   |   |           |                            |           | C  | -0.930882 | -0.958887 | 3.850076   |
| C                         | 0.609570  | -1.795986 | 5.396464   |   |           |                            |           | C  | 0.436680  | -2.637731 | 4.916131   |
| C                         | 0.486872  | -1.838140 | 2.990819   |   |           |                            |           | C  | 0.539051  | -2.343040 | 2.524736   |
| C                         | 1.013751  | -2.332778 | 4.177806   |   |           |                            |           | C  | 0.955479  | -2.999675 | 3.677272   |
| H                         | 1.765345  | -3.116569 | 4.144890   |   |           |                            |           | H  | 1.704539  | -3.782931 | 3.607572   |
| H                         | 0.828993  | -2.233457 | 2.036634   |   |           |                            |           | H  | 0.961470  | -2.608695 | 1.557295   |
| C                         | -0.326565 | -0.766538 | 5.425972   |   |           |                            |           | C  | -0.498882 | -1.611016 | 5.000339   |
| H                         | -1.594950 | 0.529369  | 4.269807   |   |           |                            |           | H  | -1.669633 | -0.165130 | 3.920723   |
| H                         | 1.033668  | -2.173214 | 6.322786   |   |           |                            |           | H  | 0.776530  | -3.140839 | 5.816548   |
| H                         | -0.639930 | -0.340977 | 6.375194   |   |           |                            |           | H  | -0.895948 | -1.314885 | 5.967476   |
| C                         | 2.719968  | 0.788202  | 1.475927   |   |           |                            |           | C  | 2.125917  | 1.163477  | 1.496354   |
| C                         | 3.248895  | -0.149435 | 2.038301   |   |           |                            |           | C  | 2.452235  | 0.593990  | 2.518535   |
| C                         | 3.813828  | -1.303161 | 2.627233   |   |           |                            |           | C  | 2.865008  | -0.086592 | 3.688191   |
| C                         | 4.385664  | -1.264402 | 3.910275   |   |           |                            |           | C  | 2.418020  | 0.326186  | 4.953847   |
| C                         | 4.889617  | -2.421132 | 4.487812   |   |           |                            |           | C  | 2.824600  | -0.349848 | 6.094976   |
| C                         | 3.773482  | -2.528649 | 1.935841   |   |           |                            |           | C  | 3.732321  | -1.189900 | 3.597922   |
| C                         | 4.279615  | -3.678516 | 2.524339   |   |           |                            |           | C  | 4.137214  | -1.854665 | 4.745973   |
| C                         | 4.836252  | -3.632981 | 3.801716   |   |           |                            |           | C  | 3.683647  | -1.441410 | 5.997098   |
| H                         | 5.230618  | -4.536082 | 4.258399   |   |           |                            |           | H  | 3.996765  | -1.969850 | 6.892960   |
| H                         | 4.411985  | -0.321084 | 4.446566   |   |           |                            |           | H  | 1.738621  | 1.170021  | 5.022291   |
| H                         | 5.325163  | -2.378785 | 5.482262   |   |           |                            |           | H  | 2.461172  | -0.028123 | 7.066976   |
| H                         | 3.337787  | -2.559524 | 0.941568   |   |           |                            |           | H  | 4.068259  | -1.513299 | 2.616979   |
| H                         | 4.239788  | -4.618231 | 1.980207   |   |           |                            |           | H  | 4.805983  | -2.707064 | 4.664699   |
| C                         | 1.122292  | 1.616507  | -0.197335  |   |           |                            |           | C  | 1.404057  | 1.217233  | -0.863384  |
| C                         | 2.148986  | 1.862992  | 0.750622   |   |           |                            |           | C  | 1.854336  | 1.878401  | 0.303989   |
| C                         | 0.685550  | 2.710436  | -0.948079  |   |           |                            |           | C  | 1.410183  | 1.956746  | -2.053000  |
| C                         | 2.624331  | 3.169346  | 0.978823   |   |           |                            |           | C  | 2.070669  | 3.271740  | 0.293005   |
| C                         | 1.165740  | 4.002039  | -0.734434  |   |           |                            |           | C  | 1.655210  | 3.326007  | -2.067750  |
| C                         | 2.125760  | 4.235947  | 0.246780   |   |           |                            |           | C  | 1.941933  | 3.997616  | -0.880061  |

## TS[2•B-6] (cont)

H 1.174437 1.464173 -2.991424  
H 2.351723 3.763315 1.220346  
H 1.598418 3.870323 -3.007200  
H 2.093158 5.073329 -0.875502  
C 1.643157 -2.078761 -0.965407  
C 2.296830 -0.915509 -0.997809  
C 2.390064 -3.255683 -1.033390  
C 3.652584 -0.701516 -1.100057  
C 3.784590 -3.135460 -1.137575  
C 4.404524 -1.884759 -1.173444  
H 1.933906 -4.244744 -1.004218  
H 4.116713 0.280100 -1.116826  
H 4.398746 -4.032125 -1.191859  
H 5.486656 -1.821519 -1.257780

## 6

E<sub>t</sub> = -4176.296160 a.u.

Cu 0.236422 -0.836444 -0.453888  
P -1.024227 -1.083303 1.377242  
P -1.131726 -0.798747 -2.277775  
C -2.200199 -2.530263 1.273660  
C -2.811394 -2.688666 -0.125364  
C -1.815201 -3.278562 -1.145655  
C -1.777243 -2.543167 -2.488699  
C -2.111522 0.337429 1.791984  
C -0.172987 -1.440595 2.963274  
C -0.331552 -0.475931 -3.897978  
C -2.585523 0.319990 -2.276953  
H -0.800300 -3.254540 -0.721879  
H -1.077442 -3.039682 -3.171035  
H -2.757782 -2.548630 -2.979594  
H -2.964701 -2.424888 2.053712  
H -1.612686 -3.419987 1.533201  
H -3.175649 -1.716213 -0.481009  
H -3.697481 -3.332742 -0.057468  
H -2.045666 -4.337276 -1.320769  
C -3.504772 0.303828 1.692743  
C -3.632546 2.632982 2.312015  
C -1.487350 1.540671 2.147024  
C -2.243113 2.675302 2.411065  
H -1.744537 3.598354 2.694787  
H -0.402214 1.581798 2.215314  
C -4.258428 1.445880 1.950674  
H -4.019067 -0.607921 1.406033  
H -4.222851 3.522058 2.515250  
H -5.340470 1.403844 1.863959  
C 0.888373 -1.119473 -4.144799  
C 1.089099 0.038776 -6.250688  
C -0.825565 0.435120 -4.833855  
C -0.115907 0.689698 -6.004083  
H -0.506853 1.402988 -6.724556  
H -1.757291 0.959792 -4.642879  
C 1.587925 -0.868452 -5.318362  
H 1.314992 -1.781701 -3.394381  
H 1.643425 0.244214 -7.162105  
H 2.538472 -1.365034 -5.490487  
C -2.458265 1.498713 -1.535979  
C -4.694413 2.152618 -2.148697  
C -3.781095 0.070874 -2.958325  
C -4.831855 0.979886 -2.887533  
H -5.758384 0.774865 -3.416612  
H -3.896609 -0.828011 -3.557745  
C -3.502905 2.414158 -1.479986  
H -1.536089 1.697429 -0.995309  
H -5.517183 2.860129 -2.095240  
H -3.387976 3.321436 -0.894129  
C -0.820805 -1.338798 4.198309  
C 1.146873 -2.191226 5.300772  
C 1.143608 -1.901327 2.908199  
C 1.796231 -2.285946 4.075280  
H 2.824979 -2.629545 4.028253  
H 1.657745 -1.927608 1.948309  
C -0.159474 -1.710418 5.362823  
H -1.838806 -0.958952 4.247531  
H 1.664882 -2.475193 6.212506  
H -0.663105 -1.623958 6.321730  
C 1.908987 1.650588 0.924358  
C 2.342857 1.356842 2.020181  
C 2.914849 0.964445 3.250478  
C 2.302208 1.279943 4.475087  
C 2.884447 0.884031 5.669802  
C 4.121943 0.241179 3.256929  
C 4.697503 -0.142498 4.458757  
C 4.083941 0.175976 5.668772  
H 4.538937 -0.127041 6.607320  
H 1.363775 1.825936 4.472860  
H 2.397569 1.127631 6.609873  
H 4.586745 -0.009176 2.308114  
H 5.632817 -0.695484 4.452300  
C 1.927764 1.472685 -1.531486  
C 1.477943 2.106706 -0.345233  
C 1.590436 2.049600 -2.757094  
C 0.680742 3.263210 -0.429590  
C 0.800540 3.192055 -2.829171  
C 0.339396 3.797267 -1.662520

## 6 (cont)

H 1.930986 1.565764 -3.668687  
H 0.357027 3.742268 0.489507  
H 0.535990 3.602267 -3.799609  
H -0.279723 4.688393 -1.714020  
C 2.137383 -0.926176 -0.882399  
C 2.722985 0.221628 -1.469935  
C 2.940433 -2.080043 -0.876505  
C 4.004109 0.201847 -2.028157  
C 4.227713 -2.108314 -1.414669  
C 4.763485 -0.964039 -1.998447  
H 2.546154 -3.003071 -0.448901  
H 4.412409 1.107808 -2.472870  
H 4.811703 -3.026080 -1.384742  
H 5.764130 -0.975776 -2.422138
